1 **Stepwise origin and evolution of a transcriptional activator and**  
2 **repressor system integrating nutrient signaling in plants**

3 Muhammed Jamsheer K<sup>1\*</sup>, Rajesh Kumar Gazara<sup>2</sup>, Sunita Jindal<sup>3</sup>, Manoj Kumar<sup>1</sup>

4 <sup>1</sup>Amity Institute of Genome Engineering, Amity University Uttar Pradesh, Sector 125,  
5 Noida 201313, India

6 <sup>2</sup>Department of Biotechnology, Indian Institute of Technology, Roorkee, Uttarakhand  
7 247667, India

8 <sup>3</sup>Department of Molecular Biology and Radiobiology, Faculty of AgriSciences, Mendel  
9 University in Brno, 61300, Brno, Czech Republic

10

11

12 **\*Correspondence**

13 MJK: [muhdjamsheer@gmail.com](mailto:muhdjamsheer@gmail.com) ; [mjamsheerk@amity.edu](mailto:mjamsheerk@amity.edu)

14

15 ORCID iD: Muhammed Jamsheer K (0000-0002-2135-8760); Rajesh Kumar Gazara  
16 (0000-0003-0115-7301); Sunita Jindal (0000-0002-0318-2204); Manoj Kumar (0000-  
17 0001-7689-9073)

18

19

20

21

22

23

24

25

26

27

28

29

30

31 **Abstract**

32 Plants possess a unique transcriptional regulatory system in which two related MYB-  
33 related transcription factors (TFs) coordinate gene expression according to phosphate  
34 (Pi) and nitrogen (N) availability. The Phosphorus Starvation Response (PSR) type TFs  
35 are transcriptional activators integrating the cellular Pi sensing machinery and gene  
36 regulation majorly under Pi starvation. The Hypersensitivity To Low Pi-Elicited Primary  
37 Root Shortening (HRS) type TFs are transcriptional repressors integrating the Pi and N  
38 availability signals through different feedback loops. They are highly connected through  
39 multiple signaling loops to finetune the transcriptional responses according to nutrient  
40 availability. Molecular functions of these TFs are fairly uncovered in model systems;  
41 however, how plants evolved this activator-repressor system is currently unknown. In this  
42 study, using sensitive evolutionary analysis, we identified a stepwise origin of the PSR-  
43 HRS regulatory system in plants. The PSR TFs were originated before the split of  
44 Prasinodermophyta and Chlorophyta. The HRS TFs were originated later in the  
45 Streptophycean algae. We also identified the asymmetric expansion of this TF repertoire  
46 in land plants majorly shaped by genome duplication and triplication events. The  
47 phylogenetic reconstruction coupled with motif analysis revealed that the origin of the  
48 specific accessory motifs is a major contributing factor in the functional divergence which  
49 led to the evolution of different sub-families preceding the angiosperm radiation. The  
50 spatiotemporal gene expression analysis in different developmental stages and nutrient  
51 availability conditions in angiosperms identified a critical role of expression divergence in  
52 shaping the functions of these TF families which is essential for adaptive plasticity of  
53 plants.

54

55

56 **Keywords:** Nutrient signaling, Transcriptional Regulation, Gene duplication, Evolutionary  
57 Divergence, Molecular Evolution

58

59

60

61

62

63

64

65

66

67

## 68 **Introduction**

69 Inorganic phosphate (Pi) is an essential component of important biomolecules such as  
70 nucleotides and phospholipids. Organisms sense the Pi availability and modulate growth  
71 and development using specialized signaling pathways. However, Pi sensing and  
72 signaling mechanisms are fundamentally different in organisms such as bacteria,  
73 opisthokonts and plants (Bergwitz and Jüppner, 2011; Ham et al., 2018; Austin and Mayer, 2020).  
74 Nonetheless, studies suggest that the SPX (named after Suppressor of yeast *gpa1*  
75 (Syg1), the yeast Phosphatase 81 (Pho81), and the human Xenotropic and polytropic  
76 retrovirus receptor 1 (Xpr1)) domain present in the proteins involved in Pi sensing and  
77 signaling machinery acts as a sensor of intracellular Pi level in eukaryotes (Wild et al.  
78 2016; Azevedo and Saiardi 2017).

79 In eukaryotes, Pi starvation triggers a large-scale rearrangement of transcriptional,  
80 translational and metabolic networks directed at enhancing Pi uptake and internal  
81 recycling. These adjustments important for the survival of cells are orchestrated by  
82 specific transcription factors (TFs) in different eukaryotic lineages. In yeast, basic helix-  
83 loop-helix (bHLH) TF, Pho4 is a master regulator of Pi starvation responses (Bergwitz  
84 and Jüppner, 2011; Austin and Mayer, 2020). In Pi sufficiency, Pho80/85, a cyclin-  
85 dependent kinase (CDK) complex inactivates Pho4 by phosphorylation-mediated  
86 cytoplasmic retention. During Pi starvation, Pho80/85 activity is inhibited by the CDK  
87 inhibitor Pho81 and it allows the entry of Pho4 to the nucleus. Pho4 binds to specific  
88 motifs in the promoters leading to the expression of high-affinity Pi transporters, secreted  
89 acid phosphatases and other genes of Pi starvation responses (Austin and Mayer, 2020).

90 In plants, the transcriptional regulation according to Pi status is majorly  
91 orchestrated by the transcription activator Phosphorus Starvation Response (PSR) and  
92 repressor Hypersensitivity To Low Pi-Elicited Primary Root Shortening (HRS) TF  
93 subfamilies. They belong to the plant-specific Golden2, ARR-B, PSR1 (GARP) TF family  
94 with solitary MYB-related SHLQ(K/M)(Y/F) DNA binding domain (DBD) (Safi et al., 2017).  
95 Thus, the TFs regulating Pi starvation responses in plants are independently originated  
96 and are fundamentally different from other eukaryotes. Pi starvation regulates the  
97 expression of members of some other TF families (such as WRKY and AP2/ERF) (Jain et  
98 al., 2012). However, they are not directly linked with the central Pi sensing machinery (Wild  
99 et al. 2016; Safi et al. 2017; Ham et al. 2018; Ried et al. 2021).

100 A PSR type TF was initially identified from the green algae *Chlamydomonas*  
101 *reinhardtii* using a forward genetic screen (Wykoff et al., 1999). These TFs possess an N-  
102 terminal MYB-related SHLQ(K/M)(Y/F) domain followed by a coiled-coil (CC) domain. The  
103 transcription of *C. reinhardtii* PSR1 is induced during Pi starvation and it regulates the  
104 expression of Pi starvation responsive genes (Shimogawara et al., 1999; Wykoff et al., 1999).  
105 Later, PSR homologs were identified as master regulators of phosphate starvation  
106 responses in different angiosperms such as Arabidopsis, Brassica, rice, wheat, etc. (Rubio

107 et al., 2001; Zhou et al., 2008; Ren et al., 2012; Wang et al., 2013). Thus, PSR subfamily TFs appear  
108 to be conserved master regulators of Pi starvation responses in the plant lineage.  
109 Intriguingly, the number of PSR TFs highly expanded in angiosperms. For example,  
110 Arabidopsis possesses 15 PSR subfamily TFs named Phosphate Starvation Response 1  
111 (AthPHR1) and PHR1-LIKE (AthPHL1-14) (Bustos et al., 2010). Recent studies indicate that  
112 the AthPHR1 activity is under tight regulation of inositol pyrophosphate 8 (InsP8)-SPX  
113 domain-mediated Pi sensing mechanism and the CC domain of PHRs play an important  
114 role in this. In Pi sufficiency, AthPHR1 interacts with AthSPX1 which prevents its  
115 interaction with PHR1 binding site (P1BS) present in Pi starvation genes leading to the  
116 downregulation of AthPHR1 activity (Puga et al., 2014). Recently, the molecular mechanism  
117 of SPX domain-dependent regulation of AthPHR1 activity under different Pi availability  
118 was identified. During Pi sufficiency, InsP8 level is increased and InsP8-SPX complex  
119 binds to the CC domain preventing the AthPHR1 oligomerization and DNA binding (Ried  
120 et al., 2021). The SPX-dependent regulation of PSR/PHR TF activity is also found to be  
121 conserved in rice (Wang et al., 2014; Zhou et al., 2021). Taken together, these results suggest  
122 that the activity of PSR/PHR type TFs is tightly regulated according to the internal Pi  
123 availability through the InsP-SPX signaling module. Interestingly, PSR/PHR TF activity is  
124 also regulated by the nitrogen (N) availability. Nitrate signaling triggers the degradation  
125 of OsSPX4 in rice leading to the activation of OsPHR2 (Hu et al., 2019).

126 HRS1, the founding member of the HRS TF subfamily was identified from  
127 Arabidopsis (Liu et al., 2009). Arabidopsis possesses single HRS1 TF and six HRS1  
128 Homologues (HHO1-6) and unlike PSR TFs, they function as transcriptional repressors  
129 (Sawaki et al., 2013; Medici et al., 2015; Kiba et al., 2018). Similar to PSR/PHR TFs, HRS/HHO  
130 TFs possess a conserved CC domain along with the solitary MYB-related  
131 SHLQ(K/M)(Y/F) DBD. The CC domain Arabidopsis HRS/HHO TFs was found to be  
132 important in dimerization which is essential for DNA binding (Ueda et al. 2020).  
133 Interestingly, HRS/HHO TFs work as integrators of Pi and N signaling (Sawaki et al., 2013;  
134 Medici et al., 2015; Maeda et al., 2018). Expression of these genes are rapidly induced by N  
135 sufficiency through NIN-Like Protein (NLP) TFs and therefore, they are also known as  
136 Nitrate-Inducible, GARP-type Transcriptional Repressors (NIGTs) (Liu et al., 2009; Sawaki et  
137 al., 2013; Medici et al., 2015; Maeda et al., 2018). AthHRS1 directly binds to the promoters of  
138 *SPX* genes and downregulates their expression (Ueda et al. 2020). Thus, HRS/HHO TFs  
139 work as activators of PSR/PHR TFs and phosphate starvation responses in plants.  
140 Interestingly, the expression of most of the AthHRS/HHOs is induced by PSR/PHR TFs  
141 while Pi starvation enhances the degradation of AthHRS1 (Sawaki et al., 2013; Medici et al.,  
142 2015; Maeda et al., 2018). Further, HRS/HHOs autoregulate their expression through a  
143 negative feedback loop (Sawaki et al., 2013; Maeda et al., 2018). These TFs are also involved  
144 in the negative regulation of nitrate (NO<sup>-3</sup>) uptake under Pi starvation by suppressing the  
145 expression of NO<sup>-3</sup> transporter (Maeda et al., 2018; Wang et al., 2020). Similar regulatory  
146 functions of HRS/HHO TFs were also identified in rice and maize suggesting their role as  
147 important integrators of Pi and N uptake and signaling in land plants through multiple  
148 regulatory loops (Sawaki et al., 2013; Wang et al., 2020).

149 Pi and N are two major macronutrients and plant growth is dependent on the  
150 optimal availability of these nutrients. The coordinated activity of the transcriptional  
151 activator PSR/PHR and transcriptional repressor HRS/HHO subfamilies appear to be  
152 important for the regulation of gene expression according to the internal Pi and N levels.  
153 These TFs are majorly studied in angiosperms. However, how this transcriptional  
154 activator-repressor system is originated in plants is yet to be identified. Functional  
155 conservation of PSR TFs in green algae suggests an early origin of master regulators of  
156 phosphate starvation responses in the plant lineage (Wykoff et al., 1999). However, the  
157 evolutionary origin of the HRS/HHO regulatory system is completely unknown.

158 Angiosperms show dramatic expansion of TF gene families. The ancient and  
159 lineage-specific whole-genome duplications (WGD) are a major contributor to this  
160 expansion of the TF repertoire in angiosperms (Shiu et al., 2005; Lehti-Shiu et al., 2017). The  
161 PSR subfamily especially shows greater expansion in angiosperms (Bustos et al., 2010; Jain  
162 et al., 2012). Gene duplication may lead to increase in dosage if it is beneficial for the  
163 organism (Veitia, 2005). It can also relax the selection pressure leading to  
164 subfunctionalization or neofunctionalization. For example, neofunctionalization of TFs  
165 lead to the evolution of floral structures in different angiosperms (Rijkema et al. 2006;  
166 Kramer et al. 2007; Mondragón-Palomino and Theißen 2011). Divergence in the DNA  
167 binding site and/or other motifs/domains or origin of novel accessory motifs can alter the  
168 DNA binding specificity or important regulatory protein-protein interactions (Singh and  
169 Hannenhalli 2008; Shen et al. 2018; Brodsky et al. 2020). Further, changes in the  
170 promoter and regulatory regions can alter the spatiotemporal expression pattern of  
171 paralogs (Singh and Hannenhalli, 2008). The current knowledge indicates that PSR and  
172 HRS TF subfamilies are an important part of the adaptive mechanisms of plants to survive  
173 under different nutrient availability. However, nothing much is known about the evolution  
174 of these TFs in the plant lineage. Availability of new genomic and transcriptomic data sets  
175 of algae and early and late diverging land plants allow the in-depth analysis of the origin  
176 and evolution of gene families. In this study, using this information, we studied how the  
177 PSR and HRS TFs originated and diversified in the plant lineage.

## 178 **Results**

### 179 **Identification of the origin of PSR and HRS TFs**

180 We used a combination of sensitive BLAST and HMM-based searches to identify the PSR  
181 and HRS TFs from different basal genomes of Archaeplastida. In our analysis of  
182 Rhodophyta (*Cyanidioschyzon merolae*, *Porphyridium purpureum*, *Porphyra umbilicalis*,  
183 *Gracilariopsis chorda*, *Chondrus crispus*) and Glaucophyta (*Cyanophora paradoxa*) algae  
184 genomes, several proteins with MYB SHLQ(K/M)(Y/F) domain were identified. However,  
185 they lacked the typical CC domain characteristics of PSR and HRS TFs. A typical PSR  
186 TF with both MYB SHLQ(K/M)(Y/F) and CC domain was identified from *Prasinoderma*  
187 *coloniale*, a member of Prasinodermophyta, which diverged before the split of  
188 Chlorophyta and Streptophyta (Li et al. 2020) (Figure 1A, 2A, Supplementary Dataset 1).  
189 Further, typical PSRs were also found in all analyzed genomes of Chlorophyta and other

190 aquatic and terrestrial algae (*Mesostigma viride*, *Chlorokybus atmophyticus*, *Chara*  
191 *braunii*, *Klebsormidium nitens*, *Mesotaenium endlicherianum*). However, HRS TFs were  
192 found to be absent in all analyzed genomes of Chlorophyta and they are present in early-  
193 diverging members of Streptophyta. This result suggests that the origin of HRS TFs  
194 coincides with the terrestrialization of plants (Figure 1A, 2A). Further, we also checked  
195 the presence of PSR and HRS-type TFs in other eukaryotic supergroups (Opisthokonta,  
196 Amoebozoa, Excavata and SAR)(Adl et al., 2012) using sensitive detection methods.  
197 However, we did not find any homologous proteins in the selected species of other  
198 eukaryotic supergroups suggesting that PSR and HRS TFs are specific to the plant  
199 lineage (Supplementary Figure 1).

200 To identify the early evolutionary pattern of these TFs, we analyzed the sequenced  
201 genomes of Marchantiophyta (*Marchantia polymorpha*), Bryophyta (*Physcomitrella*  
202 *patens*, *Sphagnum fallax*), Lycopodiophyta (*Selaginella moellendorffii*), Polypodiophyta  
203 (*Azolla filiculoides*, *Salvinia cucullata*), Pinophyta (*Picea abies*) and basal angiosperm  
204 *Amborella trichopoda*. Interestingly, in comparison to algal genomes, the number of both  
205 PSR and HRS TFs was found to be increased in these genomes (Figure 1A, 2A,  
206 Supplementary Dataset 1). However, the increase was more prominent in the PSR TF  
207 subfamily especially in genomes with lineage-specific WGDs such as *P. patens*, *S. fallax*,  
208 *A. filiculoides* and *S. cucullata* (Lang et al., 2018a; Li et al., 2018). Collectively, these results  
209 ascertain that the origin of PSR transcriptional activators precede the origin of HRS  
210 transcriptional repressors. Further, the emergence of HRS TFs coincides with the  
211 terrestrialization of the plant lineage.

## 212 **Analysis of the early evolution of PSR and HRS TFs in the plant lineage**

213 To identify the early evolutionary patterns of PSR and HRS TFs, maximum likelihood  
214 phylogenetic reconstruction was performed using the identified protein sequences from  
215 aquatic and terrestrial algae (Prasinodermophyta, Chlorophyta, Mesostigmatophyta,  
216 Chlorokybophyta and Charophyta), Marchantiophyta, Bryophyta, Lycopodiophyta,  
217 Polypodiophyta, Pinophyta and basal angiosperm *A. trichopoda*. We included *A.*  
218 *trichopoda* sequences in our analysis as it is a reference point for angiosperm evolution  
219 and gene family size (Albert et al., 2013). In the phylogenetic reconstruction of PSRs, the  
220 PSR proteins from Chlorophyta were recovered along with *P. coloniale* PSR to a  
221 statistically supported clade (bootstrap value: 0.749), indicating the sequence divergence  
222 from PSR proteins from other species (Figure 1B, Supplementary Figure 2). Interestingly,  
223 most of the duplicated PSR proteins of Bryophyta and Polypodiophyta were recovered to  
224 specific clades with shorter branch lengths. The *A. trichopoda* PSR proteins also  
225 recovered to specific clades. However, in comparison, the branch length was higher. In  
226 the phylogenetic reconstruction of HRS TFs, duplicated HRS proteins of Bryophyta and  
227 Polypodiophyta were recovered to specific clades (Figure 2B). Interestingly, all three *A.*  
228 *trichopoda* HRS proteins were recovered to different clades, indicating the possible  
229 functional specialization of HRS proteins predating the angiosperm divergence.

230 We further analyzed potential domain gain in both PSR and HRS TFs. Domain  
231 pattern analysis revealed that the typical PSR (N-terminal MYB SHLQ(K/M)(Y/F) and C-  
232 terminal CC domains) and HRS (N-terminal CC and C-terminal MYB SHLQ(K/M)(Y/F))  
233 pattern is highly conserved (Figure 1C, 2C). Further, the specific residues in both MYB  
234 SHLQ(K/M)(Y/F) and CC domain important for DNA recognition, binding and  
235 dimer/tetramerization, and interaction with SPX domain (in case of PSR) are fairly  
236 conserved across the plant kingdom (Figure 1D, 2D, Supplementary Figure 3 and 4). The  
237 structure of AthPHR1 MYB SHLQ(K/M)(Y/F) is deduced which shows the conserved MYB  
238 fold with three  $\alpha$ -helices ( $\alpha$ 1,  $\alpha$ 2, and  $\alpha$ 3) and an N-terminal flexible arm region (Jiang et  
239 al. 2019). Homology modeling of MYB SHLQ(K/M)(Y/F) domains of PSR and HRS TFs  
240 identified that MYB fold and N-terminal arm region are conserved from algae to  
241 angiosperms (Figure 1E, 2E). Among the plant MYB SHLQ(K/M)(Y/F) TFs, structure of  
242 MYB SHLQ(K/M)(Y/F) of Arabidopsis Response Regulator 10 (ARR10) and LUX is also  
243 resolved and they also possess the conserved MYB fold with three  $\alpha$ -helices. However,  
244  $\alpha$ 3 of PHR1 MYB SHLQ(K/M)(Y/F) domain is larger than ARR10 and LUX MYB  
245 SHLQ(K/M)(Y/F) domains with different three-dimension orientation. These differences  
246 are important in DNA recognition and define the target genes (Jiang et al. 2019).  
247 Therefore, to understand the conservation of three-dimensional structural topology, the  
248 homology models of selected MYB SHLQ(K/M)(Y/F) domains of PSR and HRS TFs  
249 identified in this study was structurally aligned with PHR1, ARR10 and LUX MYB  
250 SHLQ(K/M)(Y/F) domains. In our analysis, PSR and HRS MYB SHLQ(K/M)(Y/F) domains  
251 selected from different taxonomic groups showed highest similarity with PHR1 MYB  
252 SHLQ(K/M)(Y/F) domain indicating the strong structural conservation in the DBD across  
253 the plant lineage (Figure 1F, 2F). Further, we also analyzed the sequence conservation  
254 of different regions of these TFs. In line with the structural conservation, the MYB  
255 SHLQ(K/M)(Y/F) domain showed highest sequence conservation in both PHR and HRS  
256 TF subfamilies (Figure 1G, 2G). The CC domain also showed a fair degree of sequence  
257 conservation. Interestingly, the N- and C-terminus and the linker region connecting MYB  
258 SHLQ(K/M)(Y/F) and CC domains showed very low sequence conservation. In many TF  
259 families including MYBs, these non-conserved regions possess intrinsically disordered  
260 regions (IDRs) which contribute to specific DNA and protein binding (Millard et al. 2019;  
261 Brodsky et al. 2020). Therefore, we tested the disorder propensity of different regions of  
262 these TFs using the meta-predictor PONDR-FIT that shows very high accuracy over  
263 individual predictors (Xue et al. 2010). In both PSR and HRS TFs, N and C termini and  
264 linker region connecting MYB SHLQ(K/M)(Y/F) and CC domains predicted to have high  
265 propensity for disorder (Figure 1H, 2H). In line with this, we found many short and long  
266 IDRs (SIDR and LIDR) in these regions (Supplementary Figure 5). Interestingly, the CC  
267 region of PSR TFs also showed relatively high propensity for disorder due to the presence  
268 of IDRs in the junction of CC domain with other regions (Figure 1H; Supplementary Figure  
269 5A). Structural analysis of AthPHR1 CC domain revealed that the loop region is  
270 disordered that might be the reason for the prediction of IDRS in CC domain region in  
271 some cases (Ried et al., 2021).

## 272 **Analysis of the evolution of PSR and HRS TFs in angiosperms**

273 Angiosperms show very high expansion of TF gene family size which led to functional  
274 divergence and origin of novel functions (Lehti-Shiu et al., 2017). Phylogenetic reconstruction  
275 with *A. trichopoda* PSR and HRS TFs suggests functional divergence early in the  
276 angiosperm evolution. Further, in comparison to algal genomes, angiosperm genomes  
277 such as *Arabidopsis* shows high expansion of PSR and HRS TFs. Therefore, to study the  
278 evolution of these TFs in angiosperms, we analyzed the genomes of selected eudicots  
279 and monocots. We found that the number of PSR and HRS TFs are highly expanded in  
280 both eudicot and monocot genomes (Supplementary Figure 6, Supplementary Dataset  
281 1). This ancient and lineage-specific WGD and triplication (WGT) events in angiosperms  
282 can be a major factor for this expansion (Jiao et al., 2011; Qiao et al., 2019). In line with this,  
283 the polyploid species with lineage-specific WGD/WGT events possess more copies of  
284 these TFs in their genome than closely related species. For example, *Arabidopsis*  
285 *thaliana* has 15 PHR and 7 HRS TFs while *Brassica rapa* has 28 PHR and 14 HRS TFs.  
286 In addition to the two WGD ( $\beta$  and  $\alpha$ ) events common to Brassicaceae, *B. rapa* underwent  
287 an additional WGT event after the split of *Arabidopsis* and *Brassica* (Wang et al. 2011).  
288 Similarly, *Medicago truncatula* has 17 PHR and 5 HRS TFs while *Glycine max* genome  
289 that underwent a recent (~13 Mya) ago possesses 38 PHR and 15 HRS TFs (Schmutz  
290 et al. 2010). Although the number is considerably expanded, the domain composition  
291 analysis identified that the ancestral domain pattern of both PHR and HRS TFs is highly  
292 conserved in angiosperms. Further, the size and sequence similarity of MYB  
293 SHLQ(K/M)(Y/F) and CC domains were found to be highly conserved in angiosperms  
294 (Supplementary Figure 7-10). However, similar to ancestral PHR and HRS TFs, the N-  
295 and C-terminus and the linker region connecting MYB SHLQ(K/M)(Y/F) and CC domains  
296 possess very low sequence conservation in angiosperms (Supplementary Figure 7, 9).

297 Our analysis reveals a clear expansion in the PSR and HRS TF repertoire in the  
298 angiosperm genomes. Therefore, to identify the evolutionary patterns of the PSR and  
299 HRS TFs in angiosperms, a maximum likelihood phylogenetic reconstruction was  
300 performed. To aid the evolutionary analysis, we also included the ancestral sequences  
301 from aquatic and terrestrial algae, Marchantiophyta, Bryophyta, Lycopodiophyta,  
302 Polypodiophyta and Pinophyta. In the phylogenetic analysis, most of the PSR and HRS  
303 proteins were recovered into distinct clades (Figure 3, Figure 4A). We annotated the clade  
304 in which most of the proteins from basal plant genomes were recovered as subfamily I  
305 (SFI) in both phylogenetic trees. In the PSR phylogenetic tree, PSR SFI includes proteins  
306 from Chlorophyta and other aquatic and terrestrial algae along with proteins from  
307 Bryophyta, Lycopodiophyta, Polypodiophyta, Pinophyta and angiosperms  
308 (Supplementary Figure 11). Similarly, HRS SFI includes most of the proteins from aquatic  
309 and terrestrial algae (Mesostigmatophyta, Chlorokybophyta and Charophyta), all  
310 members of Polypodiophyta and few proteins from angiosperms (Supplementary Figure  
311 12). Other distinct clades were named as SFs according to their relative closeness to SFI  
312 in both PSR and HRS phylogenetic tree. In the PSR phylogeny, we identified that except  
313 a few diverged members, all other members were recovered to eight distinct subfamilies



314 including the ancestral PSR SFI (Figure 3; Supplementary Figure 11). In the case of HRS,  
315 four SFs were recovered, including the HRS SFI (Figure 4A; Supplementary Figure 12).  
316 Interestingly, the members from the *A. trichopoda* recovered to all SF clades in the PSR  
317 phylogenetic tree indicating the sequence divergence at the base of angiosperm evolution  
318 (Figure 3; Supplementary Figure 11). Supporting this hypothesis, the members from other  
319 angiosperms were found to be recovered in all SF clades with very few exceptions (for  
320 e.g., PSR SFII is absent in the analyzed legume genomes). Similar pattern was also  
321 observed in HRS TFs (Figure 4A; Supplementary Figure 12). For example, *A. trichopoda*  
322 possesses three HRS TFs and they were recovered to different clades (i.e., HRS SFII, III  
323 and IV). Further, most of the members from angiosperms were also recovered to clades  
324 corresponding to HRS SFII, III and IV (Figure 4A; Supplementary Figure 12). Collectively,  
325 our phylogenetic reconstruction suggests divergence of both PSR and HRS TF families  
326 before the angiosperm radiation. It could be possible that these SFs of PSR and HRS  
327 TFs might have specialized functions enhancing the TF repertoire available for  
328 responding to changes in nutrient availability in angiosperms.

### 329 **Origin and evolution of accessory motifs in PSR and HRS TFs**

330 Recovery of PSR and HRS proteins to distinct clades suggests strong sequence  
331 divergence and possible functional specialization. Our analysis identified that the MYB  
332 SHLQ(K/M)(Y/F) and CC domains are highly conserved while the IDR enriched N, C and  
333 linker region connecting domains are non-conserved across the plant lineage (Figure 1G,  
334 2G; Supplementary Figure 7, 9). Origin of novel motifs especially in the non-conserved  
335 regions was found to be a major factor in the protein divergence and functional  
336 specialization of TFs (Nguyen Ba et al. 2014; Cheatle Jarvela and Hinman 2015; Brodsky  
337 et al. 2020). These novel motifs may alter the protein-protein interaction and DNA  
338 recognition properties of TFs (Cheatle Jarvela and Hinman, 2015).

339 To identify whether the PSR and HRS TFs possess any novel motifs, we  
340 performed an in depth *de novo* motif discovery across the plant lineage. In our analysis,  
341 we identified 24 and 15 novel motifs with very strong statistical support in PSR and HRS  
342 TFs, respectively (Figure 4B, 5A, Supplementary Dataset 2). Interestingly, majority of  
343 these motifs were exclusive to land plants (Figure 4C, 5B). For example, the PSR TFs  
344 from aquatic and terrestrial algae were found to have only the MYB SHLQ(K/M)(Y/F) and  
345 CC domains. In case of HRS TFs, streptophyte algae also possess additional motifs such  
346 as HRS motif 1 and 2. Nevertheless, angiosperms PSR and HRS TFs have more diversity  
347 in motifs. We also identified monocot and eudicot-specific motifs in our analysis. For  
348 example, the PSR motif 15 is specific to eudicots while PSR motif 19 and 24 are specific  
349 to monocots. In HRS TFs, motif 15 was found to be specific to monocots (Figure 4C, 5B).  
350 We hypothesized that these novel motifs could be a major reason for the formation of  
351 PSR and HRS SFs in the phylogenetic reconstruction analysis. To test this, we analyzed  
352 the distribution of these motifs in SFs recovered in the phylogenetic reconstruction. We  
353 found that specific motifs and combinations are characteristics of specific subfamilies  
354 (Figure 4D, 5C, Supplementary Figure 13, 14). The SF I containing majority of the PSR

355 and HRS TFs from algal and other lower plants possess relatively simple motif  
356 composition. In comparison, some SFs that are especially conserved in angiosperms  
357 such as PSR SF VIII and HRS SF III showed very complex motif composition. We also  
358 found some exceptions to this in PSR TFs, in which PSR SF IV which is highly conserved  
359 in angiosperms possesses simple motif composition. Interestingly, the conservation of  
360 specific motif composition was found to be varied in different SFs. For example, PSR SF  
361 II and HRS SF II showed very high conservation while PSR SF VIII and HRS SF IV  
362 showed high degree of divergence in motif composition among the members  
363 (Supplementary Figure 15, 16). Taken together, the phylogenetic reconstruction and *de*  
364 *novo* motif analysis identified that PSR and HRS TFs underwent a high degree of  
365 sequence divergence and specialization, especially in angiosperms. The high  
366 conservation of these motifs across the plant lineage suggests important biological  
367 functions of these motifs in the activity of PSR and HRS TFs.

### 368 **Analysis of the accessory motif divergence in the paralogous PSR and HRS TFs**

369 In eukaryotes, divergence in the DBD and accessory motifs and expression domain were  
370 found to be the major determinants of functional specialization of paralogous TFs (Lehti-  
371 Shiu et al. 2015; Wang et al. 2016; Khor and Etensohn 2017; Shen et al. 2018; Brodsky  
372 et al. 2020). Angiosperm genomes show high expansion in the PSR and HRS TF  
373 repertoire. We hypothesized that the divergence in motif composition and expression  
374 might have led to the specialization of these TFs. To test this hypothesis, we first identified  
375 the paralogous PSR and HRS gene pairs from angiosperm genomes. The sensitive  
376 detection based on homology in the genomic regions identified that a significant majority  
377 of PSR and HRS TFs from angiosperms are paralogs in nature (Supplementary Figure  
378 17). Interestingly, motif comparison analysis identified that a large number of PSR and  
379 HRS paralogs show divergence in the motif composition (Figure 6A). In our analysis of  
380 256 PSR paralogs from 21 angiosperm genomes, we observed motif divergence in  
381 approximately 69% of the paralogs. Similarly, analysis of 91 HRS paralogs from 16  
382 angiosperms identified motif divergence in approximately 75% of paralogs. Therefore, we  
383 analyzed whether the motif divergence is correlated with sequence divergence. The  
384 analysis of the number of nonsynonymous substitutions per non-synonymous site  
385 (dN/dS) ratio identified that the PSR and HRS paralogs are under strong purifying  
386 selection (Supplementary Figure 18A). Nonetheless, at the global scale, we did not  
387 observe any clear correlation between motif divergence and sequence divergence  
388 (Supplementary Figure 18B). Collectively, our analysis suggests that motif divergence  
389 among paralogs is a major contributing factor in the divergence and functional  
390 specialization of PSR and HRS TF repertoire in angiosperms.

### 391 **Analysis of gene expression divergence of PSR and HRS TFs in angiosperms**

392 As expression divergence is an important determinant in the functional  
393 specialization of multigene families, we analyzed the conservation and divergence in  
394 tissue and developmental-specific expression of PSR and HRS gene families in different  
395 angiosperms. We analyzed the expression data from nine angiosperms which include the

396 basal angiosperm *A. trichopoda* and five eudicots (*Solanum lycopersicum*, *A. thaliana*, *G.*  
397 *max*, *M. truncatula* and *Manihot esculenta*) and three monocots (*Zea mays*, *Sorghum*  
398 *bicolor* and *Oryza sativa*) (Supplementary Figure 19). Interestingly, we observed a great  
399 degree of divergence in the expression pattern of PSR and HRS TFs in different tissues  
400 and developmental stages. Therefore, we analyzed the tissue-specificity using Tau ( $\tau$ ),  
401 one of the best metrics to analyze tissue specificity of gene expression (Kryuchkova-  
402 Mostacci and Robinson-Rechavi, 2017). In our analysis of 176 PSR genes, approximately  
403 65% (i.e., 114 genes) showed intermediate specificity ( $0.20 \leq \tau < 0.80$ ) in expression  
404 (Figure 6B). In contrast, approximately 35% (i.e., 62 genes) PSR genes showed high  
405 specificity ( $\tau \geq 0.80$ ) in expression. In 63 HRS genes, approximately 46% (i.e., 29 genes)  
406 genes showed high specificity while 54% (i.e., 34 genes) showed intermediary  
407 specificity in expression. Further, we analyzed the relation between tissue-specificity with  
408 species and SFs. In our analysis, we did not observe major differences in the  $\tau$  score  
409 among different species (Supplementary Figure 20). However, we found significant  
410 differences in the tissue-specificities of both PSR and HRS SFs (Figure 6C). For example,  
411 in PSR TFs, SFI and III showed high expression and low tissue-specificity (0.54 and 0.58  
412 average  $\tau$  respectively). The high expression levels and low-tissue specificity of these  
413 SFs suggest a predominant function of these members in Pi starvation responses. In line  
414 with this, Arabidopsis PHR1, the major PSR TF was found to be a member of SFIII with  
415 an intermediate specificity ( $\tau$ : 0.65). Similarly, rice PHR1 and PHR2, which are crucial in  
416 Pi starvation responses were also found to be members of PSR SFIII with intermediate  
417 tissue-specificity in expression (OsaPHR1  $\tau$ : 0.53; OsaPHR2  $\tau$ : 0.47) (Zhou et al., 2008).  
418 Further, we tested the conservation and divergence in the expression domain at the gene  
419 family level using Gini Correlation Coefficient (GCC) (Ma and Wang, 2012). On the global  
420 level, we found a low degree of correlation indicating high divergence in tissue-specific  
421 expression domains of PSR and HRS TF families in angiosperms (Figure 6D).  
422 Nonetheless, we found small clusters with high or very low correlation in expression. In  
423 general, young duplicates tend to have more similar expression patterns while divergence  
424 in expression domains or suppression of the expression of one copy for maintaining  
425 dosage is also very common among paralogs. Therefore, we closely analyzed the  
426 expression pattern of paralogous genes from PSR and HRS TF families from nine  
427 angiosperms. We observed a nuanced pattern of correlation among paralogous genes  
428 from species with highly duplicated genomes such as *G. max*. Some paralogous genes  
429 showed positive correlation in expression while negative correlation was also evident  
430 among few paralogs (Figure 6E). Collectively, the in-depth global analysis of tissue-  
431 specific expression in angiosperms indicates that expression divergence also contributes  
432 to the functional specialization of PSR and HRS TF family in angiosperms.

433 The PSR and HRS TFs are majorly involved in Pi and N status dependent  
434 transcriptional coordination. Therefore, although angiosperm genomes possess large  
435 repertoire of these TF families, it is possible that they are involved in a spatiotemporal  
436 manner during different Pi and N nutrition regimes. In order to understand the global  
437 transcriptional regulation of these TF families in angiosperms, we studied their expression  
438 in rice under different Pi and N nutrition regimes in both shoots and roots. Rice genome

439 contains 18 PSR and 5 HRS TF genes. Interestingly, our analysis revealed many  
440 interesting patterns of gene expression among related PSR and HRS genes. For  
441 example, among four PSR SF I genes in rice, expression of *LOC\_Os08g25820* and  
442 *LOC\_Os09g12770* were moderately increased in the late timepoints of Pi starvation in  
443 root (Figure 7A). Conversely, among the other two SFI genes, the expression of  
444 *LOC\_Os05g41240* was repressed while no change in expression was observed in the  
445 case of *LOC\_Os06g40710* in root. The same set of genes showed very different  
446 expression dynamics in shoot under Pi starvation. In the same time points, only the  
447 expression of *LOC\_Os09g12770* is slightly induced in shoots. Another example is the  
448 paralogous gene pair *LOC\_Os06g49040* and *LOC\_Os02g04640* belonging to PSR SF II.  
449 The expression of *LOC\_Os06g49040* is strongly induced in both root and shoot tissue at  
450 later stages of Pi starvation and Pi replenishment suppressed its expression. Conversely,  
451 expression of *LOC\_Os02g04640* is repressed in roots under Pi starvation and induced in  
452 response to Pi replenishment. Similar expression divergence was also observed in other  
453 PSR gene family members. Consequently, at a global scale we found very less correlation  
454 in the expression pattern under different Pi nutrition regimes (Figure 7B). High diversity  
455 in the expression dynamics was also observed in the case of rice HRS TF family under  
456 different Pi nutrition regimes (Figure 7C, D). For example, *OsaNIGT1*  
457 (*LOC\_Os02g22020*) showed strong and time-dependent induction in expression under Pi  
458 starvation in both shoots and roots. The expression of *OsaNIGT1* is rapidly repressed by  
459 Pi re-addition. In comparison, other members showed more varied expression pattern  
460 under different Pi nutrition regimes. Interestingly, the heterogeneity in the expression  
461 pattern was also evident under N starvation conditions. Among PSR genes, some genes  
462 (such as *LOC\_Os06g49040* and *LOC\_Os02g04640*) showed highly similar expression  
463 patterns under N starvation (Figure 7E, F). It should be noted that these paralogs showed  
464 highly contrasting expression patterns under different Pi nutrition regimes (Figure 7A).  
465 Thus, closely related genes such as paralogs show condition-specific positive or negative  
466 correlation in the expression. Among HRS genes, in line with the previous reports  
467 indicating strong induction of these genes during N starvation (Liu et al., 2009; Sawaki et al.,  
468 2013; Medici et al., 2015; Maeda et al., 2018) transcript levels of most of rice HRS family  
469 members were found to be repressed during N starvation especially in roots (Figure 7G,  
470 H). However, we also found that transcript level of certain members induced during N  
471 starvation. For example, expression of *LOC\_Os01g08160* was induced in root in most of  
472 the time points while the expression of *LOC\_Os12g39640* was found to be induced in  
473 shoots. Collectively, the global analysis of tissue and developmental stage-specific  
474 transcriptional dynamics of PSR and HRS TF family in angiosperms indicate that the  
475 divergence in the expression domain is a major contributor to functional divergence.  
476 Further, expression analysis in rice under different Pi and N nutrition regimes indicates  
477 that specific members have probably acquired specialized roles in a spatiotemporal  
478 manner to provide a coordinated transcriptional response according to the nutrient  
479 availability.

## 480 Discussion

481 Recent studies have identified an important role of the PSR-HRS transcriptional  
482 regulatory system in coordinating gene expression according to the Pi and N availability  
483 in plants. In this study, through sensitive evolutionary analysis, we identified interesting  
484 insights on the stepwise origin, expansion and diversification of this regulatory system in  
485 the plant lineage (Figure 8).

486 In our analysis, the PSR TFs with the characteristic MYB SHLQ(K/M)(Y/F) DBD  
487 and CC domain were found in Prasinodermophyta and Chlorophyta genomes. In contrast,  
488 the typical HRS TFs were detected only in the Streptophyta genomes. Thus, the origin of  
489 PSR-type TFs precedes the origin of HRS TFs. Further, the origin of HRS TFs coincides  
490 with the terrestrialization of the plant lineage (de Vries and Archibald, 2018). HRS TFs  
491 are involved in finetuning the transcriptional responses through different feedback  
492 signaling loops (Sawaki et al., 2013; Medici et al., 2015; Safi et al., 2017; Maeda et al., 2018). Unlike  
493 the aquatic environment, nutrients are present in patches and in different gradients in the  
494 soil (Giehl and von Wirén, 2014). Therefore, HRS TFs must be an evolutionary innovation  
495 especially important in the land plants to optimize the transcriptional responses according  
496 to diverse nutrient availability conditions on the land.

497 Although genomes from Rhodophyta and Glaucophyta also possess MYB  
498 SHLQ(K/M)(Y/F) TFs, they lack the typical CC domain present in PSR and HRS TFs. It  
499 could be possible that some of these proteins represent the ancient PSR TF system in  
500 Archaeplastida. In line with this, a *Phaeodactylum tricornutum* (Stramenopile) MYB  
501 SHAQKYF TF without the CC domain was found to be involved in the transcriptional  
502 regulation of Pi starvation responses (Sharma et al. 2020). Therefore, further functional  
503 studies of the MYB SHLQ(K/M)(Y/F) TFs from Rhodophyta and Glaucophyta genomes  
504 will be needed to identify whether they represent the ancient PSR TF system of the plant  
505 lineage. The CC domain involved in the InsP-SPX-mediated regulation of PSR TF in  
506 Arabidopsis might be an evolutionary innovation that happened later to finetune  
507 transcriptional responses according to the cellular Pi availability.

508 In our analysis, we found that the number of these TFs especially PSR type is  
509 highly expanded in most of the land plants. On a relative scale, the number of HRS TFs  
510 is moderately expanded. This difference was consistent in all genomes we analyzed. The  
511 difference in the expansion of gene families can be due to several factors such as their  
512 dosage sensitivity, essential functionalities (e.g., mutants are lethal) and contribution to  
513 adaptive benefits (e.g., enhanced abiotic stress resilience or involvement in evolutionary  
514 arms-race with microbes) to a particular environment (Wang et al., 2018). The PSR and HRS  
515 TFs may have different functions in such processes and that might be contributing to the  
516 differences in gene family expansion. PSR TFs are involved in promoting the association  
517 with beneficial bacteria and mycorrhiza (Castrillo et al. 2017; Shi et al. 2021). The HRS  
518 TFs have an important role in finetuning the transcriptional responses according to Pi and  
519 N availability. However, further studies are required to identify their specific adaptive  
520 benefits shaping the gene family size in the plants. Nonetheless, the WGD/WGT events  
521 were found to be a major factor determining the size of these gene families. For example,

522 the *M. polymorpha* genome contains three PSR and a single HRS TF gene while the *P.*  
523 *patens* genome contains 24 PSR and three HRS genes. The *M. polymorpha* genome  
524 shows low genetic redundancy especially in regulatory factors such as TFs due to the  
525 absence of ancient or lineage-specific WGD events (Bowman et al., 2017). In contrast, there  
526 is evidence for at least two WGD events specific to the moss lineage (Lang et al. 2018).  
527 The contribution of WGD/WGT in the expansion of these TFs is also evident in  
528 angiosperms and the gene family size is higher in genomes with recent WGD/WGT  
529 events.

530 Although there is strong conservation in MYB SHLQ(K/M)(Y/F) and CC domain in  
531 these TFs, we found that they were recovered into distinct clades in the phylogenetic  
532 reconstruction. This prompted us to investigate the highly disordered variable regions in  
533 these TFs. Our sensitive motif analysis identified accessory motifs conserved in these  
534 variable regions. Although there is very low sequence conservation, some of these  
535 identified motifs were found to be highly conserved and specific motifs or their  
536 combination largely define subfamilies. For example, the combination of PSR motif 10, 8  
537 and 11 in the N-terminus is specific to PSR subfamily II. The combination of HRS motif  
538 12, 6 and 2 in between the N-terminal CC domain and MYB SHLQ(K/M)(Y/F) largely  
539 defines the HRS subfamily II. Interestingly, the PSR and HRS TFs from algae largely  
540 possess simple domain composition with no or few accessory motifs. In contrast, land  
541 plants show very high diversity in the accessory motif composition. This is especially  
542 prominent in angiosperms where we identified a large number of accessory motifs specific  
543 to subfamilies. Thus, along with the expansion in the gene family size, these TFs  
544 underwent significant evolutionary divergence before the angiosperm radiation. Studies  
545 in eukaryotic TFs identified a huge impact of IDRs and accessory motifs in the TF function  
546 (Nguyen Ba et al. 2014; Cheatle Jarvela and Hinman 2015; Brodsky et al. 2020). Earlier  
547 the DBD was thought to be the major determinant in the recognition of target promoter  
548 regions. However, recent studies led to a paradigm shift in which the IDRs were found to  
549 be a major contributing factor defining the promoter recognition. For example, in Msn2  
550 and Yap1 TFs from yeast, the partially redundant regions in the IDRs independent of the  
551 DBD recognize target DNA through a multitude of weak interactions with chromatin or  
552 histones (Brodsky et al. 2020). Thus, the accessory motifs enriched in the IDRs in specific  
553 subfamilies of PSR and HRS TFs may potentially define the promoter specificities of  
554 individual subfamilies. IDRs and the motifs in IDRs may also serve as a site of protein-  
555 protein interaction (Jamsheer K et al. 2018). Therefore, it is also possible that these motifs  
556 in the IDRs may have a role in determining the recruitment of factors involved in the  
557 regulation of protein function and gene expression. For example, in plants, the divergence  
558 in the PHYB binding (APB) motif and motifs of unknown functions (MUFs) in Phytochrome  
559 Interacting Factor (PIF) TFs determine the functional specificity in plants (Possart et al.,  
560 2017). Another potential role of these accessory motifs in IDRs may be in the phase  
561 separation as the weak interaction of IDRs in TFs is a major factor determining the  
562 condensation of transcription apparatus to specific chromatin regions (Boija et al. 2018).  
563 These are the potential roles and more targeted studies will be required to determine the

564 function of these accessory motifs in PSR and HRS TFs. Intriguingly, a large fraction of  
565 paralogs (69% in PSR and 75% in HRS on a global scale) showed divergence in  
566 accessory motif composition. Thus, even at the level of paralogs, the divergence in  
567 accessory motifs seems to be a major factor in the potential functional specialization of  
568 these TFs (Figure 8).

569 As divergence in the expression domain is a critical factor determining the  
570 functional specificities in multigene families, we also investigated tissue and  
571 developmental stage-specific expression pattern of PSR and HRS TFs from nine  
572 angiosperms. We found that a significant portion of these genes (65% in PSR and 54%  
573 in HRS) show intermediate specificity in the expression domain. The rest of the genes  
574 (35% in PSR and 46% in HRS) were found to be highly specific in the expression domain.  
575 These results indicate that specificities in the expression domain are also an important  
576 factor in the functional specialization of PSR and HRS TFs. Interestingly, we also found  
577 that subfamilies show differences in tissue-specificity. Some of the prominent members  
578 characterized as major regulators of Pi starvation in model plants such as Arabidopsis  
579 (*AthPHR1*) and rice (*OsaPHR1* and *OsaPHR2*) were found to be expressed in most of  
580 the tissues and belong to subfamilies with intermediate specificity in the expression  
581 domain. We also analyzed the global correlation in the expression domain which further  
582 highlighted the differences in the expression domain. As these genes are majorly involved  
583 in the transcriptional regulation under different Pi and N availability conditions, we  
584 investigated the spatiotemporal expression pattern of rice PSR and HRS genes under  
585 different Pi and N conditions. Our analysis revealed spatiotemporal divergence in the  
586 expression domain even in closely related genes. Further, comparison of the expression  
587 pattern of closely related genes in Pi and N availability identified condition-specific  
588 positive or negative correlation in the expression. Taken together, these results suggest  
589 that although angiosperm genomes have a large repertoire of PSR and HRS TFs,  
590 different members might have specific functions under different environmental conditions.

591 Collectively, our comprehensive analysis of PSR and HRS TFs in the plant lineage  
592 identifies a stepwise evolution of a transcriptional activator-repressor coordinating gene  
593 expression according to Pi and N nutrient availability. We also found that the expansion  
594 of these genes in land plants is also correlated with the origin of novel accessory motifs  
595 and a high degree of expression divergence (Figure 8). Thus, along with redundant  
596 functions, individual members of these multigene families might also have unique  
597 functions. More targeted studies in this direction will be needed to reveal the functional  
598 complexities of these TFs in plants. Often the genetic analysis in controlled culture  
599 conditions overlooks the role of individual genes in multigene families in the fitness of the  
600 plants. However, in the natural conditions where plants face a large number of variabilities  
601 in environmental and biotic factors together, individual genes in multigene families seem  
602 to have a significant effect on the fitness of the plants. For example, genetic analysis of  
603 the three gibberellin receptor genes in tomato under a controlled environment suggests  
604 a highly redundant role of individual receptor genes. In contrast, under the field conditions,  
605 this genetic redundancy was minimal and the role of individual genes was found to be

606 more prominent (Illouz-Eliaz et al., 2019). The current genome editing techniques can help to  
607 answer these questions as it enables large-scale, multiplexed genetic screening of  
608 multigene families. Thus, the evolutionary trajectory of the PSR and HRS TF system  
609 outlined in our study will be helpful in future functional studies in this important  
610 transcriptional regulatory system of plants.

## 611 **Methods**

### 612 **Identification of PHR and HRS TF family members**

613 The protein sequences of G2-Like TFs were identified from the selected species from  
614 PlantTFDB v5.0 (Jin et al., 2017). Further, using *A. thaliana* PHR/PHL and HRS/HHO  
615 sequences as queries, BLASTP (E-value < 1E-5) search was performed in Phytozome  
616 v11.0 (Goodstein et al., 2012) and PhycoCosm (Grigoriev et al., 2021) to identify the PHR and  
617 HRS sequences from different plant species. Further, a profile-HMM based search was  
618 performed using HMMER web server v2.41.1 (Potter et al., 2018) in the respective reference  
619 proteomes (Sequence E-value: 0.01, Hit E-value: 0.03). The dataset obtained was  
620 manually filtered and repeats were removed. The CDD v3.19 (E value: < 0.01, database  
621 CDD --5570 PSSMs) (Lu et al., 2020) and MEME v5.3.3 (Bailey et al., 2015) analysis was  
622 performed to identify the sequences with conserved MYB SHLQ(K/M)(Y/F) and CC  
623 domains characteristic of PHR and HRS TFs. The final curated dataset of PSR and HRS  
624 TFs is given as Supplementary Dataset 1.

### 625 **Sequence similarity analysis**

626 The domain and interdomain regions were identified using CDD v3.19 (E value: < 0.01,  
627 database CDD --5570 PSSMs). The multiple sequence alignments (MSAs) of N-terminal,  
628 C-terminal, linker region and domains of HRS and PSR TFs were performed using  
629 MUSCLE v3.8.31 (Edgar, 2004). Aligned MSAs were subjected to Clalign (Tumescheit et al.,  
630 2021) to obtain sequence similarity matrices and Skylign (<https://skylign.org/>) to create  
631 HMM logo. These sequence similarity matrices were used to generate heat map by using  
632 heatmap.2 function of the gplots package in R.

### 633 **Phylogenetic reconstruction**

634 The full-length protein sequences were aligned and phylogenetic trees were  
635 reconstructed using Maximum likelihood (ML) method using FastTreeMP v2.1.10  
636 (JTT+CAT substitution model, 1000 bootstrap replicates) on CIPRES  
637 (<https://www.phylo.org/>). The phylogenetic trees were visualized and annotated using  
638 FigTree v1.4.4.

### 639 **Homology modeling and structural similarity analysis**

640 The MYB SHLQ(K/M)(Y/F) domain boundary was identified using CDD v3.19 (E value: <  
641 0.01, database CDD --5570 PSSMs) and homology models were created using I-  
642 TASSER server (Yang and Zhang, 2015). The model with the highest C-score was  
643 selected for further analysis. The energy minimization and refinement of the structure was



644 performed using ModRefiner (D and Y, 2011) and quality was analyzed in SAVES v6.0  
645 server using PROCHECK and Verify3D. The PDB files of MYB SHLQ(K/M)(Y/F) domain  
646 of AthPHR1, AthLUX and AthARR10 from RCSB PDB and the structural similarity  
647 analysis was performed using TM-score (Zhang and Skolnick, 2004).

#### 648 **Disorder prediction**

649 The disorder of PHR and HRS proteins were predicted using the meta-predictor PONDR-  
650 FIT (Xue et al., 2010). The average of disorder and standard deviation of each residue was  
651 obtained and used for further analysis. The boundaries of each domain/region (N-  
652 terminus, MYB SHLQ(K/M)(Y/F), Linker region, CC domain, C-terminus) were identified  
653 by CDD v3.19 (E value: < 0.01, database CDD --5570 PSSMs) and the average disorder  
654 score was calculated. The IDRs were categorized in two groups. As used in previous  
655 studies (Jamsheer K et al., 2018), stretches ranging from 10 to 29 protein residues with  
656 disorder score of  $\geq 0.5$  for each residue were categorized as short IDRs (SIDR). Amino  
657 acid stretches of  $\geq 30$  residues long with disorder score of  $\geq 0.5$  for each residue were  
658 categorized as long IDRs (LIDR). An IDR was considered as junction-IDR if at least five  
659 disordered (disorder score of  $\geq 0.5$  for each residue) residues are in the other  
660 domain/region. As used in previous studies (Jamsheer K et al., 2018), a tolerance limit of three  
661 tandem residues with less than 0.5 disorder score was set for this analysis.

#### 662 **Novel motif identification and motif divergence analysis in paralogs**

663 The full-length protein sequences were used for identifying novel motifs in PHR and HRS  
664 using MEME v5.3.3 (Bailey et al., 2015). The information regarding duplicated genes based  
665 on i-ADHoRe program, which detects homologous genomic regions were retrieved from  
666 Dicots PLAZA v4.0 and Monocots PLAZA v4.5 and used for the analysis of motif  
667 divergence among paralogs in angiosperms (Van Bel et al., 2018). Loss, gain or  
668 rearrangement of motifs were considered as divergence among paralogs. The data on  
669 conserved and diverged paralogs are in percentage in comparison with the total number  
670 of paralogs.

#### 671 **Gene expression Gini Correlation coefficient analyses**

672 The normalized RNA-seq based tissue and developmental stage-specific expression data  
673 of PHR/PHL and HRS/HHO genes from *Amborella trichocarpa* (Flores-Tornero et al., 2020),  
674 *Solanum lycopersicum* (Sato et al., 2012), *Arabidopsis thaliana* (Klepikova et al., 2016), *Glycine*  
675 *max* (Machado et al., 2020), *Medicago truncatula* (Dai et al., 2021), *Manihot esculenta* (Wilson et  
676 al., 2017), *Zea mays* (Stelpflug et al., 2016), *Sorghum bicolor* (McCormick et al., 2018), and  
677 *Oryza sativa* (Ouyang et al., 2007) were retrieved from previous studies. The tissue  
678 specificity of genes was calculated using the  $\tau$  method (Yanai et al., 2005).

679 In order to analyze the expression pattern of *O. sativa* PSR and HRS genes during  
680 nitrogen starvation, RNA-seq reads with accession numbers SRR5713884,  
681 SRR5713902, SRR5713901, SRR5713900, SRR5713899, SRR5713898, SRR5713894,  
682 SRR5713907, SRR5713906, SRR5713905, SRR5713904 and SRR5713903 were

683 downloaded from Gene Expression Omnibus (Shin et al., 2018). These RNA-seq reads were  
684 aligned to the rice reference genome (IRGSP-1.0 genome) (Kawahara et al., 2013) using  
685 STAR v2.7.7a (Dobin et al., 2013) with default parameters by using rice gene annotation  
686 (<http://rapdb.dna.affrc.go.jp/>). Normalized gene expression was calculated in terms of  
687 FPKM using StringTie v2.1.4 (Pertea et al., 2015). The publicly available normalized RNA-  
688 seq expression data of *O. sativa* Pi starvation and replenishment treatment was also used  
689 in our analysis (Secco et al., 2013). The heat map of the gene expression data was generated  
690 using Morpheus (<https://software.broadinstitute.org/morpheus/>). Gini correlation  
691 coefficient (GCC) between expressions was calculated using the `cor.pair` function of the  
692 'rsgcc' package in R (Ma and Wang, 2012).

### 693 **Selection analysis**

694 The synonymous (dS) and nonsynonymous (dN) nucleotide substitutions and dN/dS was  
695 calculated using PAL2NAL v14 (M et al., 2006) and KaKs Calculator (Zhang et al., 2006) using  
696 averaging (MA) method. The CDS and corresponding protein sequences were  
697 downloaded from PlantTFDB v5.0 (Jin et al., 2017), Phytozome v11.0 (Goodstein et al., 2012),  
698 PLAZA Dicots v4.0 and PLAZA Monocots v4.5 (Van Bel et al., 2018). Pair-wise protein  
699 sequence alignment of all paralogs was performed using MUSCLE v3.8.31 (Edgar, 2004).  
700 The aligned protein sequences were used to direct the conversion of their corresponding  
701 cDNAs into codon alignments.

### 702 **Acknowledgements and funding information**

703 This work supported by the Department of Science and Technology, Ministry of Science  
704 and Technology (DST) (INSPIRE Faculty Programme, grant no. IFA18-LSPA110 to MJK).  
705 SJ is partially supported by the Ministry of Education, Youth and Sports of the Czech  
706 Republic, grant no. CZ.02.1.01/0.0/0.0/16\_019/0000738 with support from the European  
707 Regional Development Fund - Project 'Centre for Experimental Plant Biology'.

### 708 **Conflict of interest**

709 The authors report no conflict of interest.

### 710 **Author contributions**

711 MJK conceived the study and designed the analysis. MJK, RKG, SJ and MK performed  
712 the analysis. MJK and RKG wrote the first draft and SJ and MK reviewed the manuscript.

713

714

715

716

717

718  
719  
720  
721  
722  
723  
724  
725  
726  
727  
728  
729  
730  
731  
732  
733  
734  
735  
736  
737  
738  
739  
740  
741  
742  
743  
744  
745  
746  
747  
748  
749  
750  
751  
752

## References

- A B, IA K, BR S, A D, EL C, AV Z, CH L, K S, JC M, NM H, et al** (2018) Transcription Factors Activate Genes through the Phase-Separation Capacity of Their Activation Domains. *Cell* **175**: 1842-1855.e16
- Adl SM, Simpson AGB, Lane CE, Lukeš J, Bass D, Bowser SS, Brown MW, Burki F, Dunthorn M, Hampl V, et al** (2012) The Revised Classification of Eukaryotes. *Journal of Eukaryotic Microbiology* **59**: 429–514
- Albert VA, Barbazuk WB, dePamphilis CW, Der JP, Leebens-Mack J, Ma H, Palmer JD, Rounsley S, Sankoff D, Schuster SC, et al** (2013) The Amborella Genome and the Evolution of Flowering Plants. *Science* (1979) **342**: 1241089–1241089
- Austin S, Mayer A** (2020) Phosphate Homeostasis – A Vital Metabolic Equilibrium Maintained Through the INPHORS Signaling Pathway. *Frontiers in Microbiology* **11**: 1367
- Azevedo C, Saiardi A** (2017) Eukaryotic Phosphate Homeostasis: The Inositol Pyrophosphate Perspective. *Trends in Biochemical Sciences* **42**: 219–231
- Bailey TL, Johnson J, Grant CE, Noble WS** (2015) The MEME Suite. *Nucleic Acids Research* **43**: W39
- Bergwitz C, Jüppner H** (2011) Phosphate Sensing. *Advances in Chronic Kidney Disease* **18**: 132–144
- Bowman JL, Kohchi T, Yamato KT, Jenkins J, Shu S, Ishizaki K, Yamaoka S, Nishihama R, Nakamura Y, Berger F, et al** (2017) Insights into Land Plant Evolution Garnered from the *Marchantia polymorpha* Genome. *Cell* **171**: 287-304.e15
- Brodsky S, Jana T, Mittelman K, Chapal M, Kumar DK, Carmi M, Barkai N** (2020a) Intrinsically Disordered Regions Direct Transcription Factor In Vivo Binding Specificity. *Molecular Cell* **79**: 459-471.e4
- Brodsky S, Jana T, Mittelman K, Chapal M, Kumar DK, Carmi M, Barkai N** (2020b) Intrinsically Disordered Regions Direct Transcription Factor In Vivo Binding Specificity. *Molecular Cell* **79**: 459-471.e4
- Bustos R, Castrillo G, Linhares F, Puga MI, Rubio V, Pérez-Pérez J, Solano R, Leyva A, Paz-Ares J** (2010) A central regulatory system largely controls transcriptional activation and repression responses to phosphate starvation in *Arabidopsis*. *PLoS Genetics*. doi: 10.1371/journal.pgen.1001102
- Castrillo G, Teixeira PJPL, Paredes SH, Law TF, de Lorenzo L, Feltcher ME, Finkel OM, Breakfield NW, Mieczkowski P, Jones CD, et al** (2017) Root microbiota drive direct integration of phosphate stress and immunity. *Nature* 2017 543:7646 **543**: 513–518
- Cheatle Jarvela AM, Hinman VF** (2015) Evolution of transcription factor function as a mechanism for changing metazoan developmental gene regulatory networks. *Evodevo*. doi: 10.1186/2041-9139-6-3

- 753 **D X, Y Z** (2011) Improving the physical realism and structural accuracy of protein models by a two-step  
754 atomic-level energy minimization. *Biophys J* **101**: 2525–2534
- 755 **Dai X, Zhuang Z, Boschiero C, Dong Y, Zhao PX** (2021) LegumeIP V3: from models to crops—an  
756 integrative gene discovery platform for translational genomics in legumes. *Nucleic Acids Research*  
757 **49**: D1472–D1479
- 758 **Dobin A, Davis CA, Schlesinger F, Drenkow J, Zaleski C, Jha S, Batut P, Chaisson M, Gingeras TR** (2013)  
759 STAR: ultrafast universal RNA-seq aligner. *Bioinformatics* **29**: 15–21
- 760 **Edgar RC** (2004) MUSCLE: multiple sequence alignment with high accuracy and high throughput. *Nucleic*  
761 *Acids Research* **32**: 1792–1797
- 762 **Flores-Tornero M, Vogler F, Mutwil M, Potěšil D, Ihnatová I, Zdráhal Z, Sprunck S, Dresselhaus T** (2020)  
763 Transcriptomic and Proteomic Insights into *Amborella trichopoda* Male Gametophyte Functions.  
764 *Plant Physiology* **184**: 1640
- 765 **Giehl RFH, von Wirén N** (2014) Root Nutrient Foraging. *Plant Physiology* **166**: 509–517
- 766 **Goodstein DM, Shu S, Howson R, Neupane R, Hayes RD, Fazo J, Mitros T, Dirks W, Hellsten U, Putnam**  
767 **N, et al** (2012) Phytozome: a comparative platform for green plant genomics. *Nucleic Acids*  
768 *Research* **40**: D1178–D1186
- 769 **Grigoriev I v, Hayes RD, Calhoun S, Kamel B, Wang A, Ahrendt S, Dusheyko S, Nikitin R, Mondo SJ,**  
770 **Salamov A, et al** (2021) PhycoCosm, a comparative algal genomics resource. *Nucleic Acids*  
771 *Research* **49**: D1004–D1011
- 772 **Ham BK, Chen J, Yan Y, Lucas WJ** (2018) Insights into plant phosphate sensing and signaling. *Current*  
773 *Opinion in Biotechnology* **49**: 1–9
- 774 **Hu B, Jiang Z, Wang W, Qiu Y, Zhang Z, Liu Y, Li A, Gao X, Liu L, Qian Y, et al** (2019) Nitrate–NRT1.1B–  
775 SPX4 cascade integrates nitrogen and phosphorus signalling networks in plants. *Nature Plants* 2019  
776 5:4 5: 401–413
- 777 **Illouz-Eliaz N, Ramon U, Shohat H, Blum S, Livne S, Mendelson D, Weiss D** (2019) Multiple Gibberellin  
778 Receptors Contribute to Phenotypic Stability under Changing Environments. *The Plant Cell* **31**:  
779 1506–1519
- 780 **J Y, Y Z** (2015) I-TASSER server: new development for protein structure and function predictions. *Nucleic*  
781 *Acids Res* **43**: W174–W181
- 782 **J Z, F J, Z W, Y L, X W, X H, W Z, P W** (2008) OsPHR2 is involved in phosphate-starvation signaling and  
783 excessive phosphate accumulation in shoots of plants. *Plant Physiol* **146**: 1673–1686
- 784 **Jain A, Nagarajan VK, Raghothama KG** (2012) Transcriptional regulation of phosphate acquisition by  
785 higher plants. *Cellular and Molecular Life Sciences* **69**: 3207–3224
- 786 **Jamsheer K M, Shukla BN, Jindal S, Gopan N, Mannully CT, Laxmi A** (2018) The FCS-like zinc finger  
787 scaffold of the kinase SnRK1 is formed by the coordinated actions of the FLZ domain and  
788 intrinsically disordered regions. *J Biol Chem.* doi: 10.1074/jbc.RA118.002073

- 789 **Jiao Y, Wickett NJ, Ayyampalayam S, Chanderbali AS, Landherr L, Ralph PE, Tomsho LP, Hu Y, Liang H,**  
790 **Soltis PS, et al** (2011) Ancestral polyploidy in seed plants and angiosperms. *Nature* **473**: 97–100
- 791 **Jin J, Tian F, Yang D-C, Meng Y-Q, Kong L, Luo J, Gao G** (2017) PlantTFDB 4.0: toward a central hub for  
792 transcription factors and regulatory interactions in plants. *Nucleic Acids Research* **45**: D1040–  
793 D1045
- 794 **Kawahara Y, de la Bastide M, Hamilton JP, Kanamori H, McCombie WR, Ouyang S, Schwartz DC,**  
795 **Tanaka T, Wu J, Zhou S, et al** (2013) Improvement of the *Oryza sativa* Nipponbare reference  
796 genome using next generation sequence and optical map data. *Rice* 2013 6:1 **6**: 1–10
- 797 **Khor JM, Etensohn CA** (2017) Functional divergence of paralogous transcription factors supported the  
798 evolution of biomineralization in echinoderms. *Elife*. doi: 10.7554/eLife.32728
- 799 **Kiba T, Inaba J, Kudo T, Ueda N, Konishi M, Mitsuda N, Takiguchi Y, Kondou Y, Yoshizumi T, Ohme-**  
800 **Takagi M, et al** (2018) Repression of nitrogen starvation responses by members of the arabidopsis  
801 GARP-type transcription factor NIGT1/HRS1 subfamily. *Plant Cell* **30**: 925–945
- 802 **Klepikova A v., Kasianov AS, Gerasimov ES, Logacheva MD, Penin AA** (2016) A high resolution map of  
803 the *Arabidopsis thaliana* developmental transcriptome based on RNA-seq profiling. *The Plant*  
804 *Journal* **88**: 1058–1070
- 805 **Kramer EM, Holappa L, Gould B, Jaramillo MA, Setnikov D, Santiago PM** (2007) Elaboration of B gene  
806 function to include the identity of novel floral organs in the lower eudicot *Aquilegia*. *Plant Cell* **19**:  
807 750–766
- 808 **Kryuchkova-Mostacci N, Robinson-Rechavi M** (2017) A benchmark of gene expression tissue-specificity  
809 metrics. *Briefings in Bioinformatics* **18**: 205–214
- 810 **Kumar Sharma A, Mühlroth A, Jouhet J, Maréchal E, Alipanah L, Kissen R, Brembu T, Bones AM, Winge**  
811 **P** (2020) The Myb-like transcription factor phosphorus starvation response (PtPSR) controls  
812 conditional P acquisition and remodelling in marine microalgae. *New Phytologist* **225**: 2380–2395
- 813 **Lang D, Ullrich KK, Murat F, Fuchs J, Jenkins J, Haas FB, Piednoel M, Gundlach H, van Bel M, Meyberg**  
814 **R, et al** (2018a) The *Physcomitrella patens* chromosome-scale assembly reveals moss genome  
815 structure and evolution. *The Plant Journal* **93**: 515–533
- 816 **Lang D, Ullrich KK, Murat F, Fuchs J, Jenkins J, Haas FB, Piednoel M, Gundlach H, Bel M van, Meyberg**  
817 **R, et al** (2018b) The *Physcomitrella patens* chromosome-scale assembly reveals moss genome  
818 structure and evolution. *The Plant Journal* **93**: 515–533
- 819 **Lehti-Shiu MD, Panchy N, Wang P, Uygun S, Shiu SH** (2017) Diversity, expansion, and evolutionary  
820 novelty of plant DNA-binding transcription factor families. *Biochimica et Biophysica Acta - Gene*  
821 *Regulatory Mechanisms* **1860**: 3–20
- 822 **Lehti-Shiu MD, Uygun S, Moghe GD, Panchy N, Fang L, Hufnagel DE, Jasicki HL, Feig M, Shiu SH** (2015)  
823 Molecular evidence for functional divergence and decay of a transcription factor derived from  
824 whole- genome duplication in *Arabidopsis thaliana*. *Plant Physiology* **168**: 1717–1734

- 825 **Li FW, Brouwer P, Carretero-Paulet L, Cheng S, de Vries J, Delaux PM, Eily A, Koppers N, Kuo LY, Li Z, et**  
826 **al** (2018) Fern genomes elucidate land plant evolution and cyanobacterial symbioses. *Nature Plants*  
827 **4**: 460–472
- 828 **Li L, Wang S, Wang H, Sahu SK, Marin B, Li H, Xu Y, Liang H, Li Z, Cheng S, et al** (2020) The genome of  
829 *Prasinoderma coloniale* unveils the existence of a third phylum within green plants. *Nature Ecology*  
830 *and Evolution* **4**: 1220–1231
- 831 **Liu H, Yang H, Wu C, Feng J, Liu X, Qin H, Wang D** (2009) Overexpressing HRS1 confers hypersensitivity  
832 to low phosphate-elicited inhibition of primary root growth in *Arabidopsis thaliana*. *Journal of*  
833 *Integrative Plant Biology* **51**: 382–392
- 834 **M J, L S, MN I, JA L, X W, Q W, Q W, W Y, Y W** (2019) Structural basis for the Target DNA recognition and  
835 binding by the MYB domain of phosphate starvation response 1. *FEBS J* **286**: 2809–2821
- 836 **M S, D T, P B** (2006) PAL2NAL: robust conversion of protein sequence alignments into the corresponding  
837 codon alignments. *Nucleic Acids Res.* doi: 10.1093/NAR/GKL315
- 838 **M VB, T D, E V, L K, A B, Y V de P, F C, K V** (2018) PLAZA 4.0: an integrative resource for functional,  
839 evolutionary and comparative plant genomics. *Nucleic Acids Res* **46**: D1190–D1196
- 840 **Ma C, Wang X** (2012) Application of the Gini Correlation Coefficient to Infer Regulatory Relationships in  
841 Transcriptome Analysis. *Plant Physiology* **160**: 192–203
- 842 **Machado FB, Moharana KC, Almeida-Silva F, Gazara RK, Pedrosa-Silva F, Coelho FS, Grativol C,**  
843 **Venancio TM** (2020) Systematic analysis of 1298 RNA-Seq samples and construction of a  
844 comprehensive soybean (*Glycine max*) expression atlas. *The Plant Journal* **103**: 1894–1909
- 845 **Maeda Y, Konishi M, Kiba T, Sakuraba Y, Sawaki N, Kurai T, Ueda Y, Sakakibara H, Yanagisawa S** (2018)  
846 A NIGT1-centred transcriptional cascade regulates nitrate signalling and incorporates phosphorus  
847 starvation signals in *Arabidopsis*. *Nature Communications* **9**: 1–14
- 848 **McCormick RF, Truong SK, Sreedasyam A, Jenkins J, Shu S, Sims D, Kennedy M, Amirebrahimi M,**  
849 **Weers BD, McKinley B, et al** (2018) The *Sorghum bicolor* reference genome: improved assembly,  
850 gene annotations, a transcriptome atlas, and signatures of genome organization. *The Plant Journal*  
851 **93**: 338–354
- 852 **Medici A, Marshall-Colon A, Ronzier E, Szponarski W, Wang R, Gojon A, Crawford NM, Ruffel S, Coruzzi**  
853 **GM, Krouk G** (2015) AtNIGT1/HRS1 integrates nitrate and phosphate signals at the *Arabidopsis*  
854 root tip. *Nature Communications* **6**: 1–11
- 855 **Millard PS, Kragelund BB, Burow M** (2019) R2R3 MYB Transcription Factors – Functions outside the  
856 DNA-Binding Domain. *Trends in Plant Science* **24**: 934–946
- 857 **Mondragón-Palomino M, Theißen G** (2011) Conserved differential expression of paralogous DEFICIENS-  
858 and GLOBOSA-like MADS-box genes in the flowers of Orchidaceae: Refining the “orchid code.”  
859 *Plant Journal* **66**: 1008–1019

- 860 **Nguyen Ba AN, Strome B, Hua JJ, Desmond J, Gagnon-Arsenault I, Weiss EL, Landry CR, Moses AM**  
861 (2014) Detecting Functional Divergence after Gene Duplication through Evolutionary Changes in  
862 Posttranslational Regulatory Sequences. *PLoS Computational Biology* **10**: e1003977
- 863 **Perteua M, Perteua GM, Antonescu CM, Chang T-C, Mendell JT, Salzberg SL** (2015) StringTie enables  
864 improved reconstruction of a transcriptome from RNA-seq reads. *Nature Biotechnology* 2015 33:3  
865 **33**: 290–295
- 866 **Possart A, Xu T, Paik I, Hanke S, Keim S, Hermann HM, Wolf L, Hiß M, Becker C, Huq E, et al** (2017)  
867 Characterization of phytochrome interacting factors from the moss *Physcomitrella patens*  
868 illustrates conservation of phytochrome signaling modules in land plants. *Plant Cell* **29**: 310–330
- 869 **Potter SC, Luciani A, Eddy SR, Park Y, Lopez R, Finn RD** (2018) HMMER web server: 2018 update.  
870 *Nucleic Acids Research* **46**: W200–W204
- 871 **Puga MI, Mateos I, Charukesi R, Wang Z, Franco-Zorrilla JM, de Lorenzo L, Irigoyen ML, Masiero S,**  
872 **Bustos R, Rodríguez J, et al** (2014) SPX1 is a phosphate-dependent inhibitor of Phosphate  
873 Starvation Response 1 in *Arabidopsis*. *Proc Natl Acad Sci U S A* **111**: 14947–14952
- 874 **Qiao X, Li Q, Yin H, Qi K, Li L, Wang R, Zhang S, Paterson AH** (2019) Gene duplication and evolution in  
875 recurring polyploidization-diploidization cycles in plants. *Genome Biology* **20**: 38
- 876 **Ren F, Guo QQ, Chang LL, Chen L, Zhao CZ, Zhong H, Li XB** (2012) *Brassica napus* PHR1 Gene Encoding a  
877 MYB-Like Protein Functions in Response to Phosphate Starvation. *PLoS ONE*. doi:  
878 10.1371/journal.pone.0044005
- 879 **Ried MK, Wild R, Zhu J, Pipercevic J, Sturm K, Broger L, Harmel RK, Abriata LA, Hothorn LA, Fiedler D,**  
880 **et al** (2021) Inositol pyrophosphates promote the interaction of SPX domains with the coiled-coil  
881 motif of PHR transcription factors to regulate plant phosphate homeostasis. *Nature*  
882 *Communications* **12**: 1–13
- 883 **Rijkema AS, Royaert S, Zethof J, van der Weerden G, Gerats T, Vandenbussche M** (2006) Analysis of  
884 the *Petunia TM6* MADS box gene reveals functional divergence within the DEF/AP3 lineage. *Plant*  
885 *Cell* **18**: 1819–1832
- 886 **Rubio V, Linhares F, Solano R, Martín AC, Iglesias J, Leyva A, Paz-Ares J** (2001) A conserved MYB  
887 transcription factor involved in phosphate starvation signaling both in vascular plants and in  
888 unicellular algae. *Genes and Development* **15**: 2122–2133
- 889 **S L, J W, F C, MK D, RC G, NR G, M G, DI H, GH M, JS S, et al** (2020) CDD/SPARCLE: the conserved domain  
890 database in 2020. *Nucleic Acids Res* **48**: D265–D268
- 891 **S O, W Z, J H, H L, M C, K C, F T-N, RL M, Y L, L Z, et al** (2007) The TIGR Rice Genome Annotation  
892 Resource: improvements and new features. *Nucleic Acids Res*. doi: 10.1093/NAR/GKL976
- 893 **Safi A, Medici A, Szponarski W, Ruffel S, Lacombe B, Krouk G** (2017) The world according to GARP  
894 transcription factors. *Current Opinion in Plant Biology* **39**: 159–167

- 895 **Sato S, Tabata S, Hirakawa H, Asamizu E, Shirasawa K, Isobe S, Kaneko T, Nakamura Y, Shibata D, Aoki**  
896 **K, et al** (2012) The tomato genome sequence provides insights into fleshy fruit evolution. *Nature*  
897 2012 485:7400 **485**: 635–641
- 898 **Sawaki N, Tsujimoto R, Shigyo M, Konishi M, Toki S, Fujiwara T, Yanagisawa S** (2013) A nitrate-  
899 inducible GARP family gene encodes an auto-repressible transcriptional repressor in rice. *Plant and*  
900 *Cell Physiology* **54**: 506–517
- 901 **SC S, RS S, B V, CN H, CR B, N de L, SM K** (2016) An Expanded Maize Gene Expression Atlas based on  
902 RNA Sequencing and its Use to Explore Root Development. *Plant Genome*. doi:  
903 10.3835/PLANTGENOME2015.04.0025
- 904 **Schmutz J, Cannon SB, Schlueter J, Ma J, Mitros T, Nelson W, Hyten DL, Song Q, Thelen JJ, Cheng J, et**  
905 **al** (2010) Genome sequence of the palaeopolyploid soybean. *Nature* **463**: 178–183
- 906 **Secco D, Jabnour M, Walker H, Shou H, Wu P, Poirier Y, Whelan J** (2013) Spatio-Temporal Transcript  
907 Profiling of Rice Roots and Shoots in Response to Phosphate Starvation and Recovery. *The Plant*  
908 *Cell* **25**: 4285–4304
- 909 **Shen N, Zhao J, Schipper JL, Zhang Y, Bepler T, Leehr D, Bradley J, Horton J, Lapp H, Gordan R** (2018)  
910 Divergence in DNA Specificity among Paralogous Transcription Factors Contributes to Their  
911 Differential In Vivo Binding. *Cell Systems* **6**: 470-483.e8
- 912 **Shi J, Zhao B, Zheng S, Zhang X, Wang X, Dong W, Xie Q, Wang G, Xiao Y, Chen F, et al** (2021) A  
913 phosphate starvation response-centered network regulates mycorrhizal symbiosis. *Cell* **184**: 5527-  
914 5540.e18
- 915 **Shimogawara K, Wykoff DD, Usuda H, Grossman AR** (1999) *Chlamydomonas reinhardtii* mutants  
916 abnormal in their responses to phosphorus deprivation. *Plant Physiology* **120**: 685–693
- 917 **Shin S-Y, Jeong JS, Lim JY, Kim T, Park JH, Kim J-K, Shin C** (2018) Transcriptomic analyses of rice (*Oryza*  
918 *sativa*) genes and non-coding RNAs under nitrogen starvation using multiple omics technologies.  
919 *BMC Genomics* 2018 19:1 **19**: 1–20
- 920 **Shiu SH, Shih MC, Li WH** (2005) Transcription factor families have much higher expansion rates in plants  
921 than in animals. *Plant Physiology* **139**: 18–26
- 922 **Singh LN, Hannehalli S** (2008) Functional diversification of paralogous transcription factors via  
923 divergence in DNA binding site motif and in expression. *PLoS ONE*. doi:  
924 10.1371/journal.pone.0002345
- 925 **Tumescheit C, Firth AE, Brown K** (2021) CIALign - A highly customisable command line tool to clean,  
926 interpret and visualise multiple sequence alignments. *bioRxiv* 2020.09.14.291484
- 927 **Ueda Y, Kiba T, Yanagisawa S** (2020a) Nitrate-inducible NIGT1 proteins modulate phosphate uptake and  
928 starvation signalling via transcriptional regulation of SPX genes. *Plant Journal* **102**: 448–466
- 929 **Ueda Y, Nosaki S, Sakuraba Y, Miyakawa T, Kiba T, Tanokura M, Yanagisawa S** (2020b) NIGT1 family  
930 proteins exhibit dual mode DNA recognition to regulate nutrient response-associated genes in  
931 *Arabidopsis*. *PLOS Genetics* **16**: e1009197



- 932 **Veitia RA** (2005) Paralogs in polyploids: One for all and all for one? *Plant Cell* **17**: 4–11
- 933 **de Vries J, Archibald JM** (2018) Plant evolution: landmarks on the path to terrestrial life. *New*  
934 *Phytologist* **217**: 1428–1434
- 935 **Wang J, Sun J, Miao J, Guo J, Shi Z, He M, Chen Y, Zhao X, Li B, Han FP, et al** (2013) A phosphate  
936 starvation response regulator Ta-PHR1 is involved in phosphate signalling and increases grain yield  
937 in wheat. *Annals of Botany* **111**: 1139–1153
- 938 **Wang J, Tao F, Marowsky NC, Fan C** (2016) Evolutionary fates and dynamic functionalization of young  
939 duplicate genes in arabidopsis genomes. *Plant Physiology* **172**: 427–440
- 940 **Wang P, Moore BM, Panchy NL, Meng F, Lehti-Shiu MD, Shiu S-H** (2018) Factors Influencing Gene  
941 Family Size Variation Among Related Species in a Plant Family, Solanaceae. *Genome Biology and*  
942 *Evolution* **10**: 2596–2613
- 943 **Wang X, Wang H, Wang J, Sun R, Wu J, Liu S, Bai Y, Mun JH, Bancroft I, Cheng F, et al** (2011) The  
944 genome of the mesopolyploid crop species *Brassica rapa*. *Nature Genetics* **43**: 1035–1040
- 945 **Wang X, Wang HF, Chen Y, Sun MM, Wang Y, Chen YF** (2020) The transcription factor NIGT1.2  
946 modulates both phosphate uptake and nitrate influx during phosphate starvation in arabidopsis  
947 and maize. *Plant Cell* **32**: 3519–3534
- 948 **Wang Z, Ruan W, Shi J, Zhang L, Xiang D, Yang C, Li C, Wu Z, Liu Y, Yu Y, et al** (2014) Rice SPX1 and SPX2  
949 inhibit phosphate starvation responses through interacting with PHR2 in a phosphate-dependent  
950 manner. *Proc Natl Acad Sci U S A* **111**: 14953–14958
- 951 **Wild R, Gerasimaite R, Jung JY, Truffault V, Pavlovic I, Schmidt A, Saiardi A, Jacob Jessen H, Poirier Y,**  
952 **Hothorn M, et al** (2016) Control of eukaryotic phosphate homeostasis by inositol polyphosphate  
953 sensor domains. *Science* (1979) **352**: 986–990
- 954 **Wilson MC, Mutka AM, Hummel AW, Berry J, Chauhan RD, Vijayaraghavan A, Taylor NJ, Voytas DF,**  
955 **Chitwood DH, Bart RS** (2017) Gene expression atlas for the food security crop cassava. *New*  
956 *Phytologist* **213**: 1632–1641
- 957 **Wykoff DD, Grossman AR, Weeks DP, Usuda H, Shimogawara K** (1999) Psr1, a nuclear localized protein  
958 that regulates phosphorus metabolism in *Chlamydomonas*. *Proc Natl Acad Sci U S A* **96**: 15336–  
959 15341
- 960 **Xue B, Dunbrack RL, Williams RW, Dunker AK, Uversky VN** (2010) PONDR-FIT: A meta-predictor of  
961 intrinsically disordered amino acids. *Biochimica et Biophysica Acta - Proteins and Proteomics* **1804**:  
962 996–1010
- 963 **Y Z, J S** (2004) Scoring function for automated assessment of protein structure template quality. *Proteins*  
964 **57**: 702–710
- 965 **Yanai I, Benjamin H, Shmoish M, Chalifa-Caspi V, Shklar M, Ophir R, Bar-Even A, Horn-Saban S, Safran**  
966 **M, Domany E, et al** (2005) Genome-wide midrange transcription profiles reveal expression level  
967 relationships in human tissue specification. *Bioinformatics* **21**: 650–659

- 968 **Zhang Z, Li J, Zhao XQ, Wang J, Wong GKS, Yu J** (2006) KaKs\_Calculator: Calculating Ka and Ks Through  
969 Model Selection and Model Averaging. *Genomics, Proteomics & Bioinformatics* **4**: 259–263
- 970 **Zhou J, Hu Q, Xiao X, Yao D, Ge S, Ye J, Li H, Cai R, Liu R, Meng F, et al** (2021) Mechanism of phosphate  
971 sensing and signaling revealed by rice SPX1-PHR2 complex structure. *Nature Communications* 2021  
972 **12**:1 **12**: 1–10
- 973 **Zhou J, Jiao FC, Wu Z, Li Y, Wang X, He X, Zhong W, Wu P** (2008) OsPHR2 is involved in phosphate-  
974 starvation signaling and excessive phosphate accumulation in shoots of plants. *Plant Physiology*  
975 **146**: 1673–1686
- 976

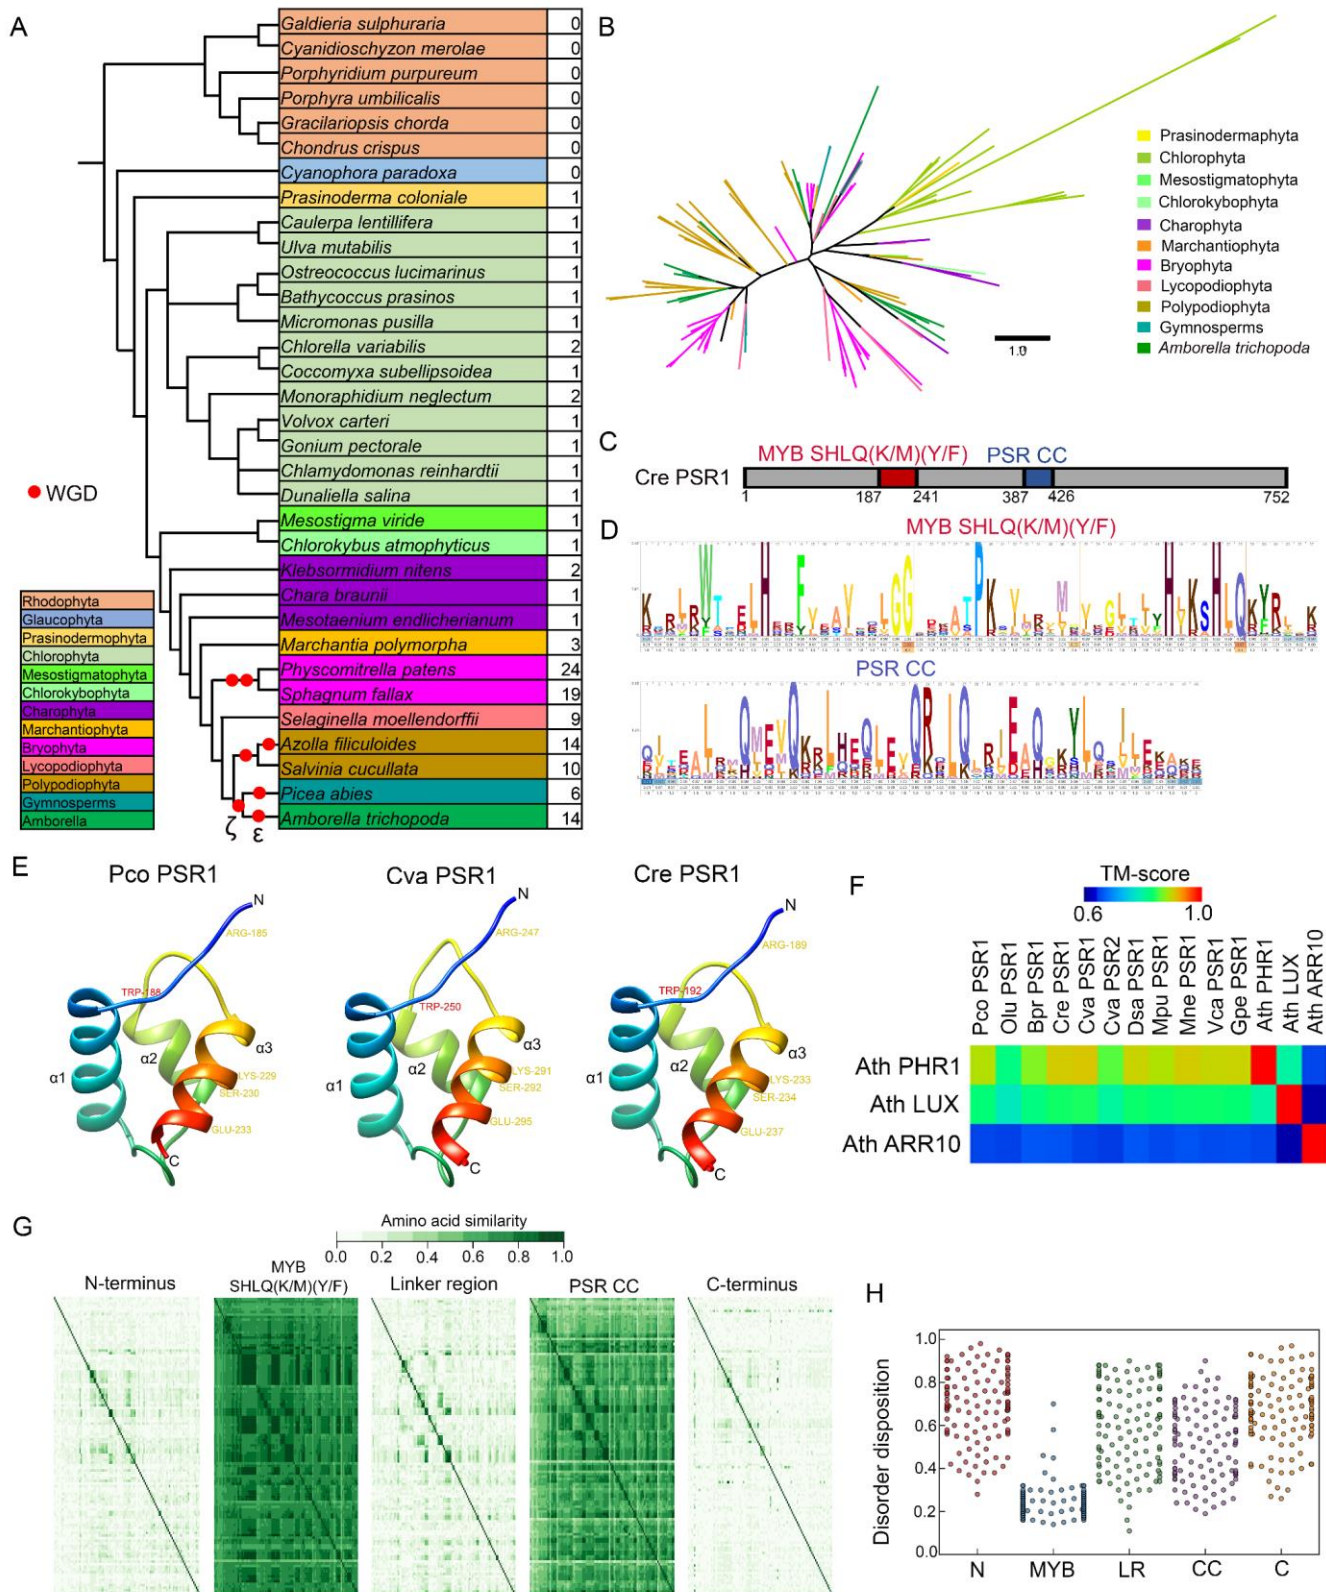

**Figure 1. Origin and expansion of PSR transcription factor family in plants.**

(A) Number of PSR TFs in different species of Archaeplastida. (B) Simplified topology of the reconstructed phylogenetic tree of the PSR TF family across the plant lineage. Branches are colored according to taxonomic groups. The phylogenetic tree reconstruction was performed using the maximum likelihood estimation method based on the JTT+CAT substitution model with 1000 bootstrap replicates. The detailed visualization of the phylogenetic tree is given in Supplementary Figure S2. (C) The typical domain composition of PSR TFs. The *Chlamydomonas reinhardtii* PSR1 is shown as the representative. (D) HMM profile of MYB SHLQ(K/M)(Y/F) and Coiled-Coil (CC) domains of PSR TF family. (E) Homology-based models of MYB SHLQ(K/M)(Y/F) from selected algal PSRs. The position of conserved tryptophan (red) and residues important for DNA recognition and binding (yellow) are indicated. (F) Structural similarity of MYB SHLQ(K/M)(Y/F) from different PSRs with MYB SHLQ(K/M)(Y/F) of Arabidopsis GARP TFs. (G) Sequence similarity of different regions of PSR proteins across the plant lineage. (H) Average disorder score of different regions of PSR proteins across the plant lineage.

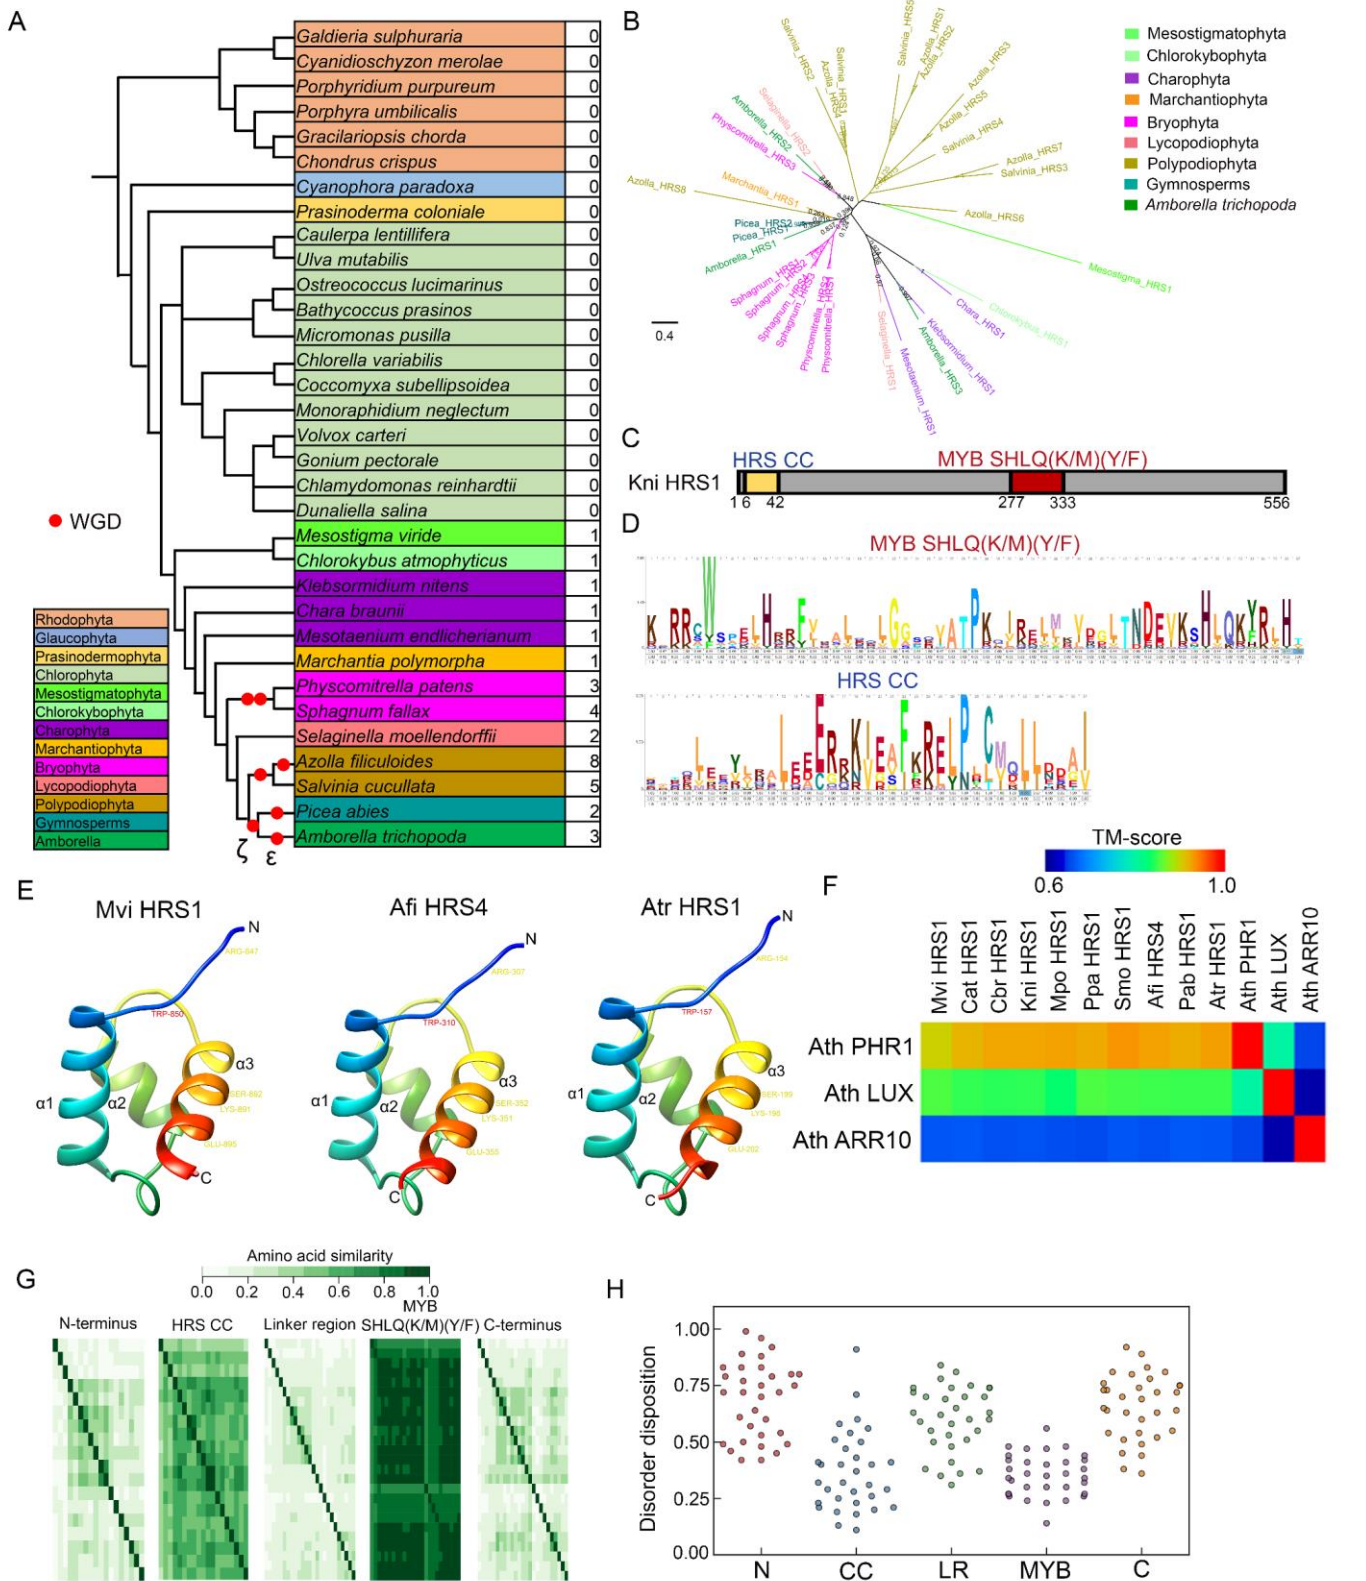

**Figure 2. Origin and evolution of HRS transcription factor family in plants.**

(A) Number of HRS TFs in different species of Archaeplastida. (B) Phylogenetic reconstruction of HRS TF family across the plant lineage. Branches are colored according to taxonomic groups. The phylogenetic tree reconstruction was performed using the maximum likelihood estimation method based on the JTT+CAT substitution model with 1000 bootstrap replicates. (C) The typical domain composition of HRS TFs. The *Klebsormidium nitens* HRS1 is shown as the representative. (D) HMM profile of MYB SHLQ(K/M)(Y/F) and Coiled-Coil (CC) domains of HRS TF family. (E) Homology-based models of MYB SHLQ(K/M)(Y/F) from selected algal HRSs. The position of conserved tryptophan (red) and residues important for DNA recognition and binding (yellow) are indicated. (F) Structural similarity of MYB SHLQ(K/M)(Y/F) from different HRSs with MYB SHLQ(K/M)(Y/F) of Arabidopsis GARP TFs. (G) Sequence similarity of different regions of HRS proteins across the plant lineage. (H) Average disorder score of different regions of HRS proteins across the plant lineage.

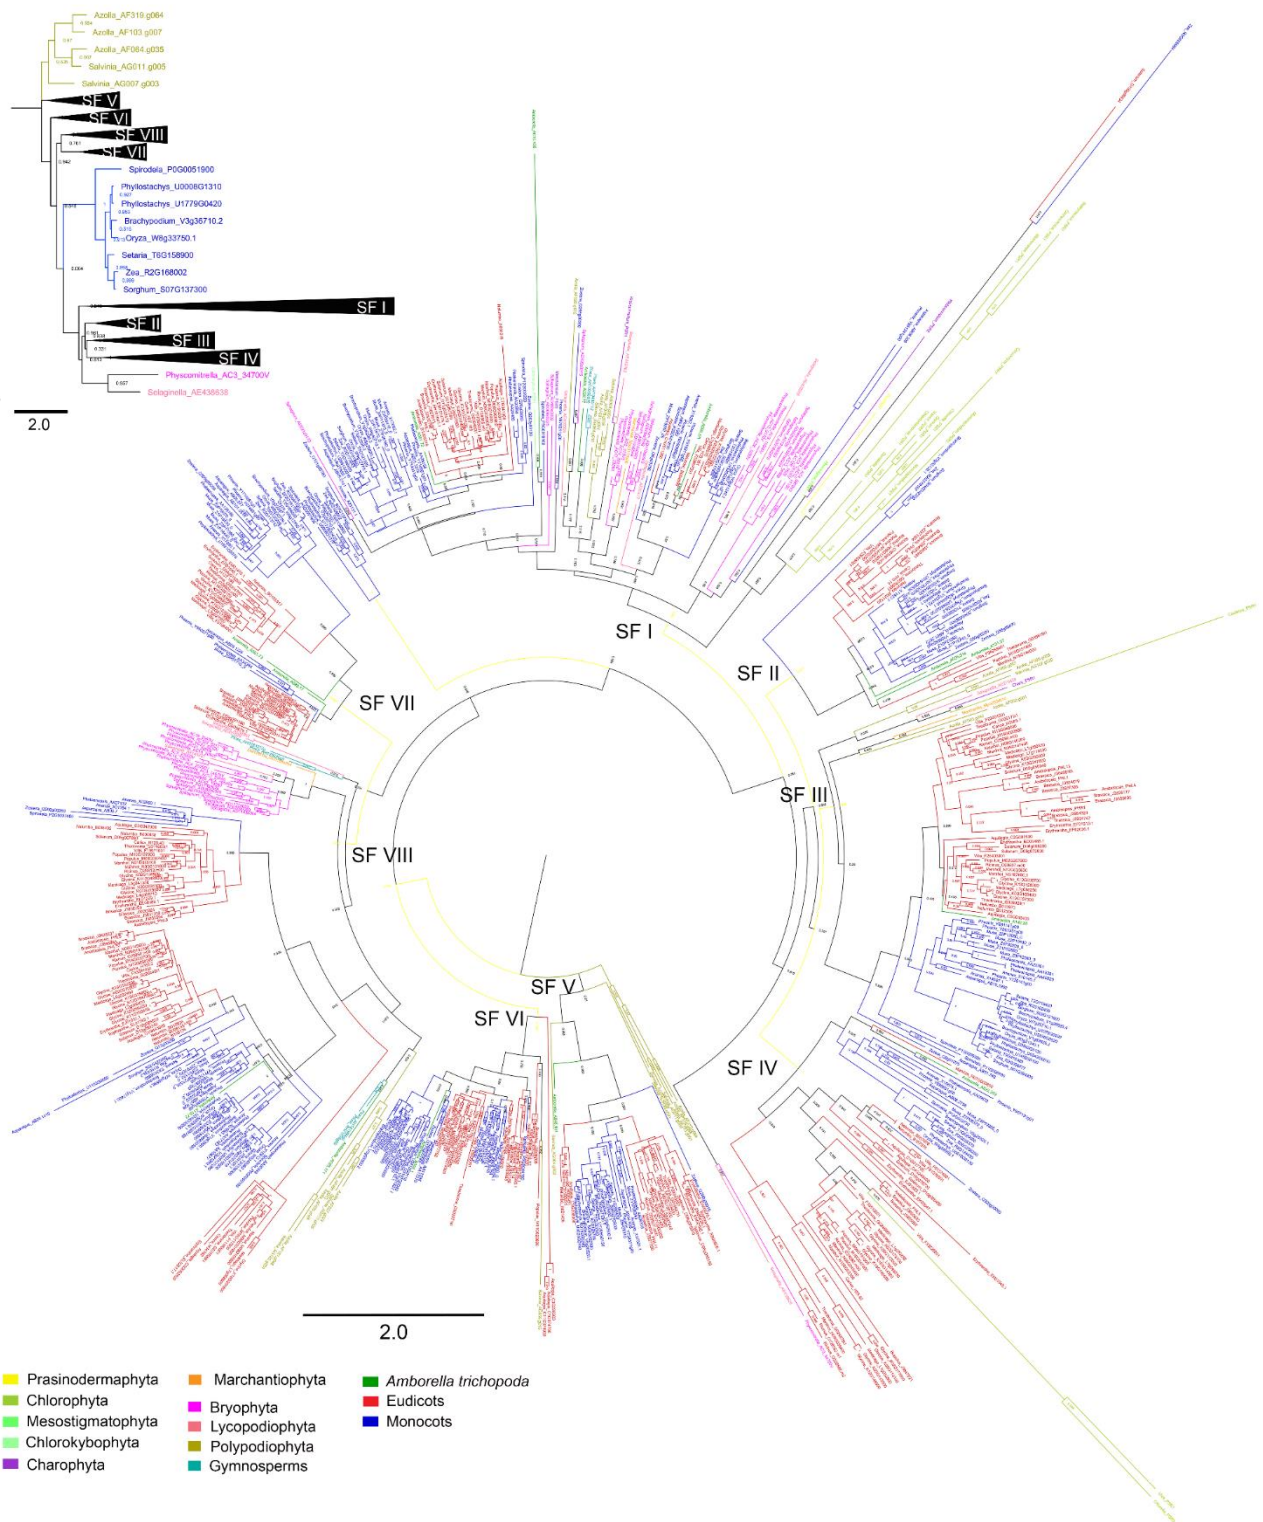

**Figure 3. Phylogenetic reconstruction of PSR transcription factor family in the plant lineage.**

The simplified topology representation of the reconstructed phylogenetic tree showing different subfamilies (collapsed) is given at the top and the detailed phylogenetic tree is given below. The phylogenetic tree reconstruction was performed using the maximum likelihood estimation method based on the JTT+CAT substitution model with 1000 bootstrap replicates. Branches are colored according to taxonomic groups and different subfamilies are indicated.

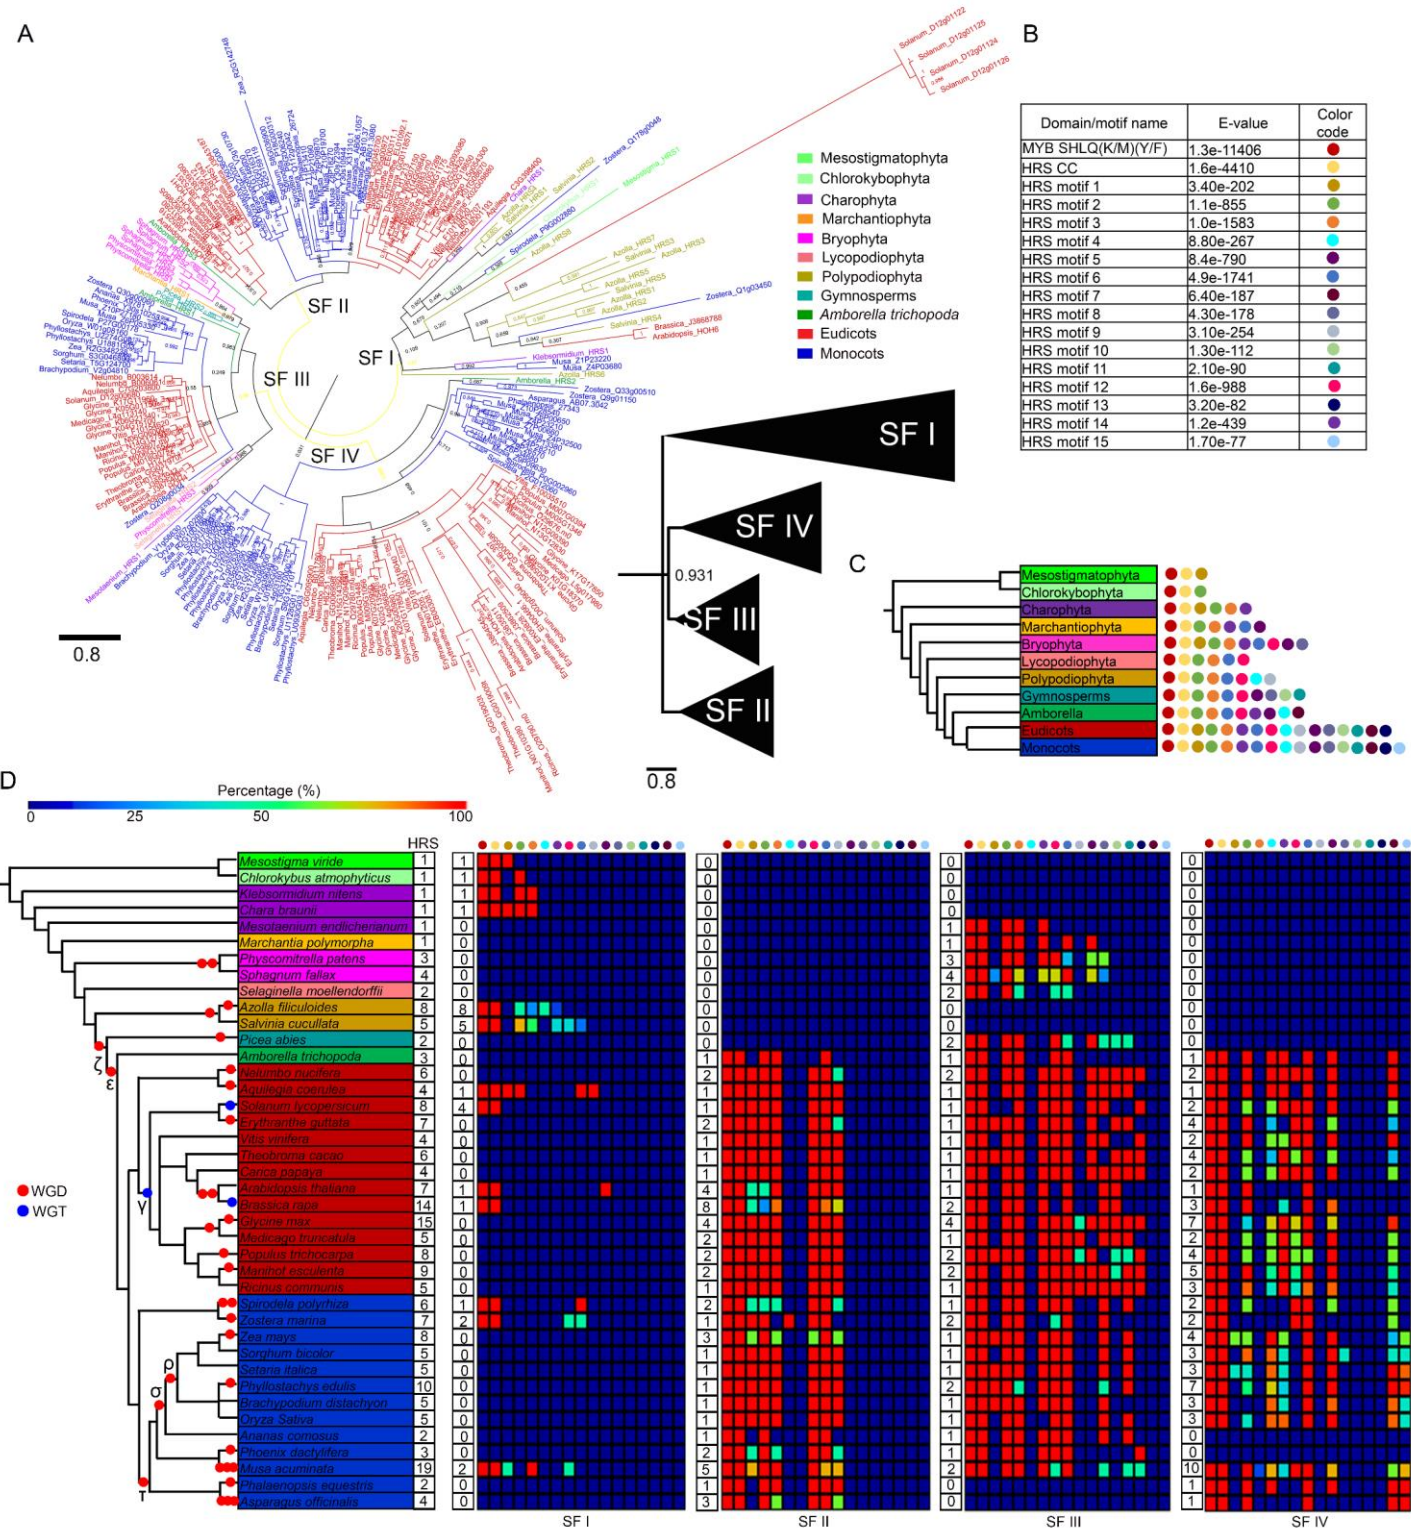

**Figure 4. Phylogenetic reconstruction and motif analysis of HRS transcription factor family in the plant lineage.**

(A) The phylogenetic reconstruction of HRS TF family in the plant lineage. The detailed phylogenetic tree and simplified topology representation of the reconstructed phylogenetic tree showing different subfamilies (collapsed) are shown. The phylogenetic tree reconstruction was performed using the maximum likelihood estimation method based on the JTT+CAT substitution model with 1000 bootstrap replicates. Branches are colored according to taxonomic groups and different subfamilies are indicated. (B) Novel motifs identified from HRS TF family in the plant lineage. (C) Taxonomical categories of Archaeplastida showing the presence or absence of specific novel motifs. (D) Conservation of novel protein motifs in different subfamilies of HRS TF family. The detailed visualization of domain/motif arrangement in different HRS TF subfamilies is given Supplementary Figure S14.

A

| Domain/motif name  | E-value    | Color code | Domain/motif name | E-value   | Color code |
|--------------------|------------|------------|-------------------|-----------|------------|
| MYB SHLQ(K/M)(Y/F) | 3.1e-13302 | ●          | PSR motif 12      | 2.7e-841  | ●          |
| PSR CC             | 6.7e-7172  | ●          | PSR motif 13      | 1.80e-67  | ●          |
| PSR motif 1        | 5.1e-448   | ●          | PSR motif 14      | 3.40e-42  | ●          |
| PSR motif 2        | 2.60e-91   | ●          | PSR motif 15      | 1.00e-62  | ●          |
| PSR motif 3        | 2.00e-54   | ●          | PSR motif 16      | 5.20e-268 | ●          |
| PSR motif 4        | 6.0e-445   | ●          | PSR motif 17      | 2.60e-229 | ●          |
| PSR motif 5        | 1.70e-132  | ●          | PSR motif 18      | 9.90e-171 | ●          |
| PSR motif 6        | 1.10e-89   | ●          | PSR motif 19      | 1.10e-63  | ●          |
| PSR motif 7        | 5.00e-42   | ●          | PSR motif 20      | 1.40e-59  | ●          |
| PSR motif 8        | 9.80e-214  | ●          | PSR motif 21      | 1.20e-78  | ●          |
| PSR motif 9        | 1.20e-75   | ●          | PSR motif 22      | 1.00e-62  | ●          |
| PSR motif 10       | 1.00e-232  | ●          | PSR motif 23      | 2.20e-35  | ●          |
| PSR motif 11       | 2.50e-110  | ●          | PSR motif 24      | 1.40e-59  | ●          |

B

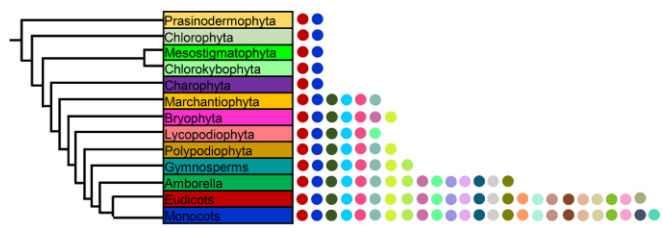

C

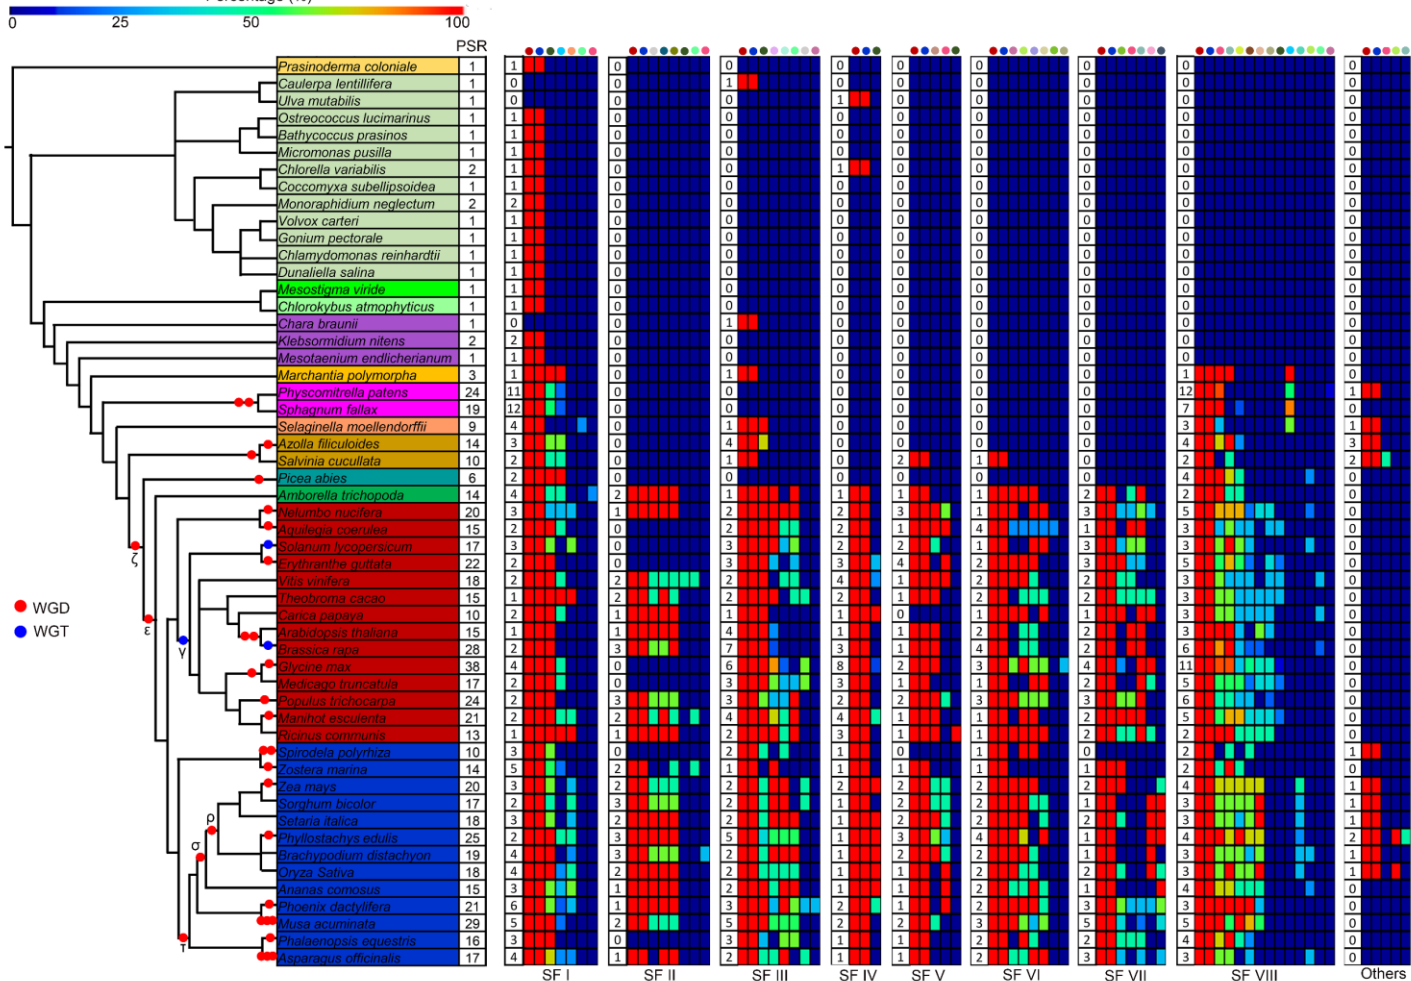

**Figure 5. Origin and conservation of novel protein motifs in PSR transcription factor family in the plant lineage.**

(A) Novel motifs identified from PSR TF family in the plant lineage. (B) Taxonomical categories of Archaeplastida showing the presence or absence of specific novel motifs in PSR TF family. (C) Conservation of novel protein motifs in different subfamilies of PSR TF family. The detailed visualization of domain/motif arrangement in different PSR TF subfamilies is given Supplementary Figure S13.

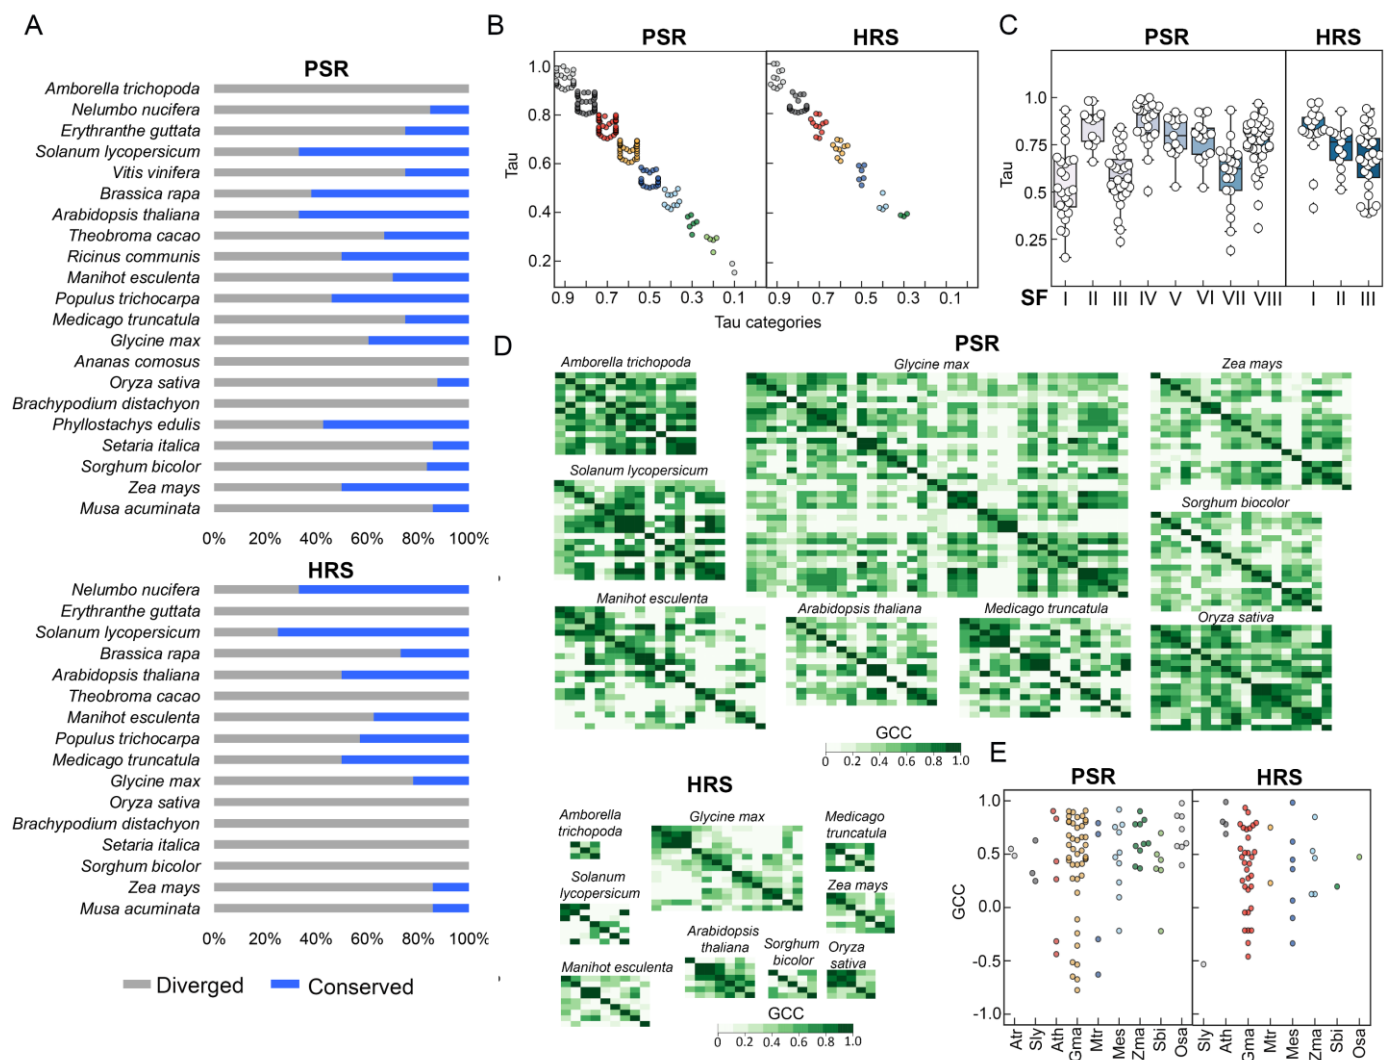

**Figure 6. Motif evolution and expression patterns of PSR and HRS transcription factor families in angiosperms.**

(A) Motif conservation and divergence of paralogous PSR and HRS TFs across the angiosperm lineage. (B) Distribution of tissue-specificity score of PSR and HRS TFs. The tissue and developmental-stage specific expression data of basal angiosperm *Amborella trichopoda* and 5 eudicots (*Solanum lycopersicum*, *Arabidopsis thaliana*, *Glycine max*, *Medicago truncatula* and *Manihot esculenta*) and 3 monocots (*Zea mays*, *Sorghum bicolor* and *Oryza sativa*) were analyzed using Tau ( $\tau$ ) method. (C) Distribution of tissue-specificity score of different subfamilies of PSR and HRS TFs. (D) Correlation of expression pattern of PSR and HRS TFs analyzed using Gini Correlation Coefficient (GCC). The genes were arranged according to the evolutionary relationship (paralogs) and relative position in the phylogenetic reconstruction. (E) Correlation of expression pattern between paralogous PSR and HRS TFs.



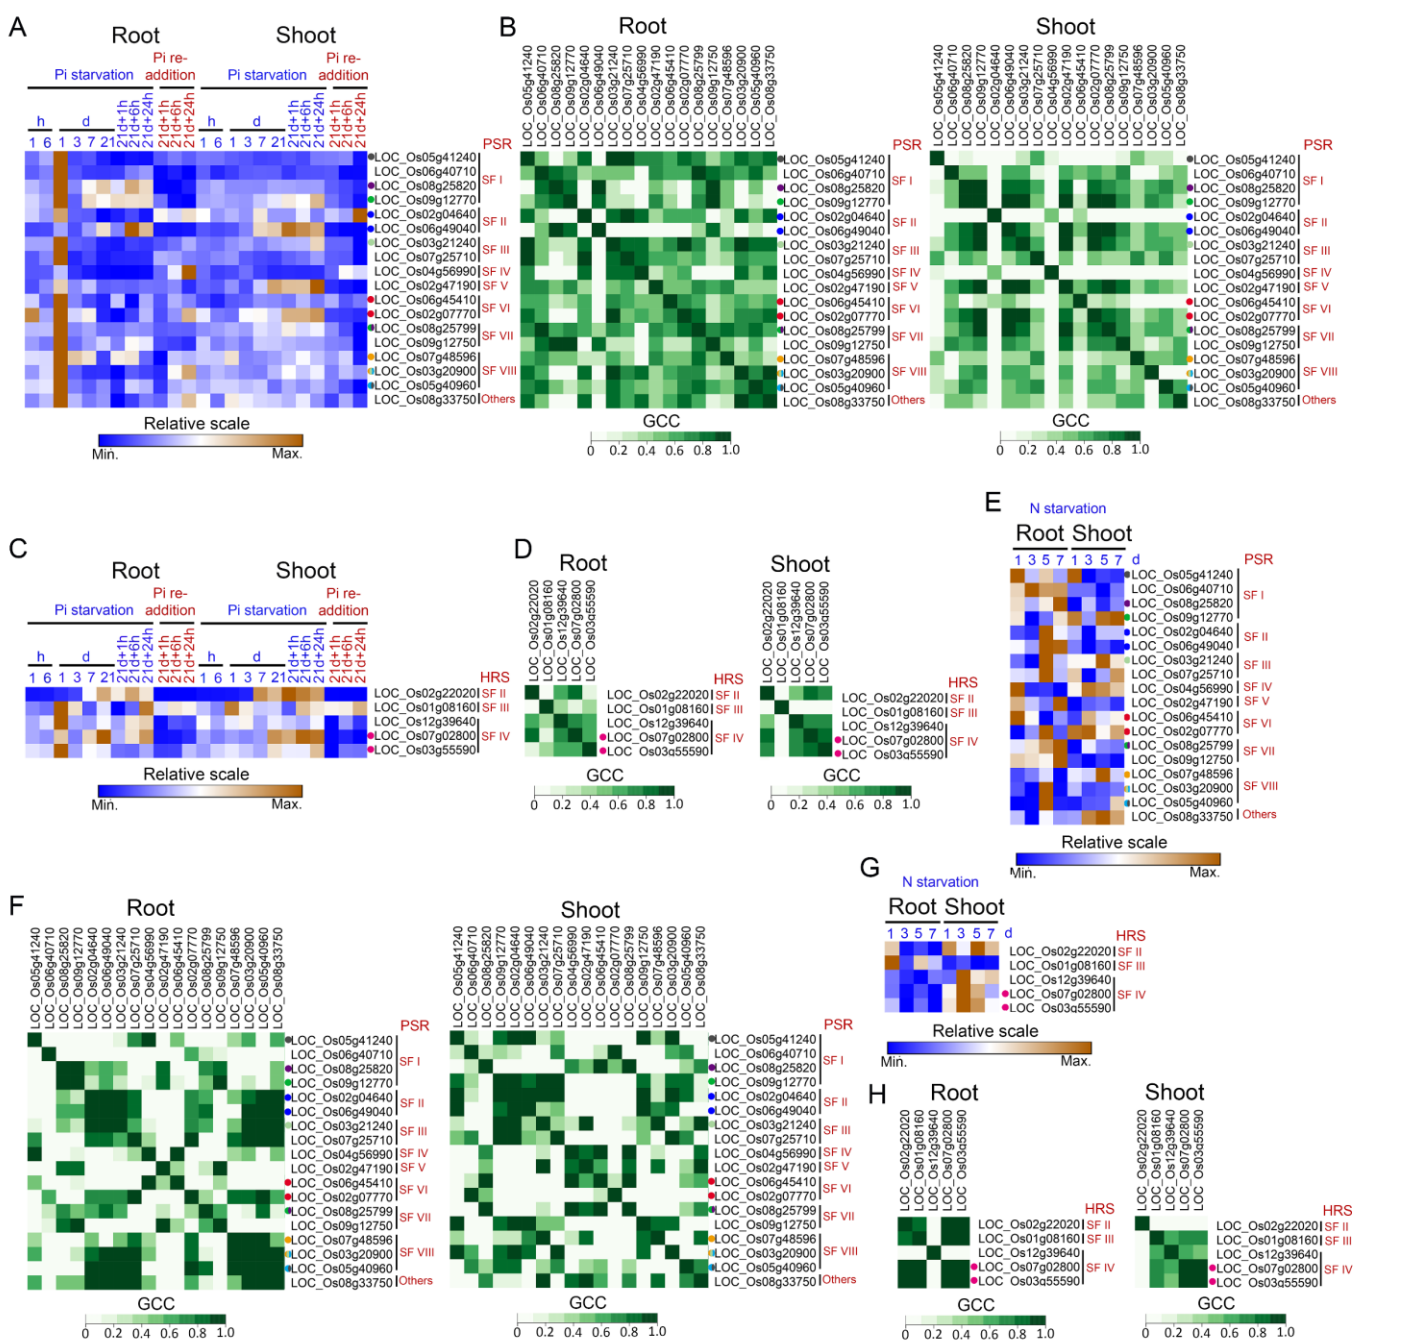

**Figure 7. Expression analysis of rice PSR and HRS transcription factors under diverse phosphate and nitrogen regimes.**

(A) Root and shoot-specific expression pattern of rice PSR TFs in short-term (1 and 6 hours) and long-term (1, 3, 7, and 21 days) Pi starvation and replenishment after 21 days (1, 6 and 24 hours). (B) Correlation of expression pattern of PSR TFs in root and shoot under different Pi nutrition regimes analyzed using Gini Correlation Coefficient (GCC). (C) and (D) Root and shoot-specific expression pattern of rice HRS TFs and correlation of expression pattern under different Pi nutrition regimes. (E) and (F) Root and shoot-specific expression pattern of rice PSR TFs in different stages (1, 3, 5, 7 days) of N starvation and correlation of expression pattern. (G) and (H) Root and shoot-specific expression pattern of rice HRS TFs under different stages N starvation and correlation of expression pattern. Paralogs are indicated with dots of different colors.

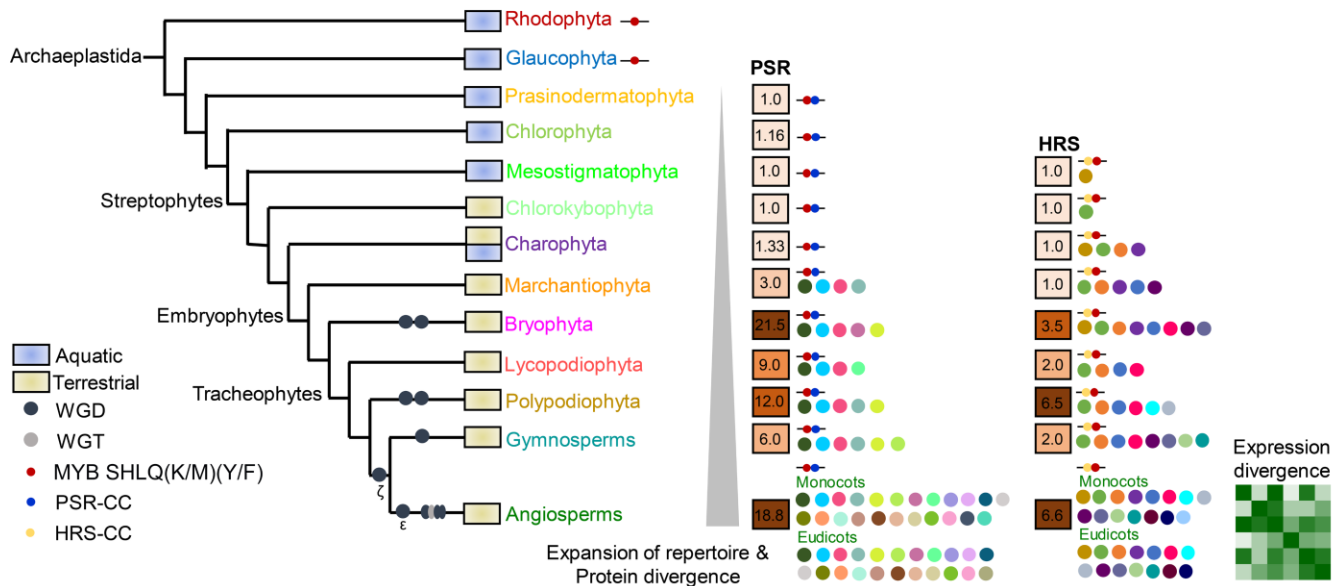

**Figure 8. A model of the origin, expansion and divergence of PSR and HRS repertoire in the plant lineage.**

The PSR TF is more ancient and originated in aquatic algae. The origin of HRS TFs possibly coincides with the terrestrialization of plants. The origin of accessory motives is also indicated. In land plants, especially in angiosperms, the PSR-HRS repertoire is enhanced due to the ancient and lineage-specific whole-genome duplication and triplication events and the origin of novel motifs may have contributed to the functional specialization. Analysis of the expression dynamics in angiosperms suggests expression divergence also contributes to the functional specialization of these TFs in angiosperms.
